# Supplementary material for: MtDNA species-level phylogeny and delimitation support significantly underestimated diversity and endemism in the largest Neotropical cichlid genus (Cichlidae: Crenicichla)
Source: PeerJ. 2021 Nov 9;9:e12283. doi: 10.7717/peerj.12283 (PMC8588857; doi:10.7717/peerj.12283)
Supplement: Supplemental Information 2 [file peerj-09-12283-s002.xls]

## Sheet: Table S1 Species delimitation
Complete Species name (complete)	Species short (former name)	sampled specimens (voucher codes Cx to Cxxx)	species discovery (mPTP=bPTP=GMYC)	GMYC	bPTP	mPTP	ND2	cytb	Source/Collection locality
Teleocichla preta Varella et al., 2016 (valid)	preta (sp. Xingu II)	C597_Teleocichla_sp_Xingu_II_Cutuvelo	1	1	1	1	MW563582		Rio Xingu, Cutuvelo, 3°17'22.49" S, 52° 3'45.31"W
Teleocichla monogramma Kullander, 1988 (valid)	monogramma	C599_Teleocichla_monogramma_Xingu_Cutuvelo	1	1	1	1	MW563584		Rio Xingu, Cutuvelo, 3°17'22.49" S, 52° 3'45.31"W
		C593_Teleocichla_monogramma_Xingu_Cutuvelo					MW563578		Rio Xingu, Cutuvelo, 3°17'22.49" S, 52° 3'45.31"W
		C595_Teleocichla_monogramma_Xingu_Cutuvelo					MW563580		Rio Xingu, Cutuvelo, 3°17'22.49" S, 52° 3'45.31"W
		C596_Teleocichla_monogramma_Xingu_Cutuvelo					MW563581		Rio Xingu, Cutuvelo, 3°17'22.49" S, 52° 3'45.31"W
		C594_Teleocichla_monogramma_Xingu_Cutuvelo					MW563579		Rio Xingu, Cutuvelo, 3°17'22.49" S, 52° 3'45.31"W
		C592_Teleocichla_monogramma_Xingu_Cutuvelo					MW563577		Rio Xingu, Cutuvelo, 3°17'22.49" S, 52° 3'45.31"W
Teleocichla aff. proselytus Arapiuns	aff. Proselytus Arapiuns	C704_Teleocichla_aff_proselytus	1	1	1	1	MW563656		Rio Tapajos drainage, Rio Arapiuns, 2°39'10.29"S, 55°43'9.17"W
Teleocichla proselytus Kullander, 1988 (valid)	proselytus	C586_Teleocichla_proselytus	1	1	1	1	MW563572		Rio Tapajos, rapids above São Luis Do Tapajós, 4°30'38.78"S, 56°15'13.29"W
		C588_Teleocichla_proselytus					MW563573		Rio Tapajos, rapids above São Luis Do Tapajós, 4°30'38.78"S, 56°15'13.29"W
		C589_Teleocichla_proselytus					MW563574		Rio Tapajos, rapids above São Luis Do Tapajós, 4°30'38.78"S, 56°15'13.29"W
Teleocichla sp. Xingu IV	sp. Xingu IV	C247_Teleocichla_sp_Xingu_IV	1	1	1	1	MW563407		Rio Xingu, São Félix do Xingu, 6°39'12.40"S, 51°59'53.84"W
Teleocichla sp. Xingu III	sp. Xingu III	C578_Teleocichla_sp_Xingu_III	1	1	2	1	MW563565		Rio Xingu, São Félix do Xingu, 6°39'12.40"S, 51°59'53.84"W
		C580_Teleocichla_sp_Xingu_III					MW563567		Rio Xingu, São Félix do Xingu, 6°39'12.40"S, 51°59'53.84"W
Teleocichla cinderella Kullander, 1988 (valid)	cinderella	C700_Teleocichla_cinderella	1	1	1	1	MW563655		Rio Tocantins, Marabá, 5.3194650S, 49.0857183W
Teleocichla centrarchus Kullander, 1988 (valid)	centrarchus	C579_Teleocichla_centrarchus	1	1	1	1	MW563566		Rio Xingu, main river below Cachoeira Grande, 3° 8'48.90"S, 51°39'23.70"W
		C242_Teleocichla_centrarchus						MW584409	Rio Xingu, main river below Cachoeira Grande, 3° 8'48.90"S, 51°39'23.70"W
		C244_Teleocichla_centrarchus					JF520124.1	JF519990.1	Piálek et al., 2012
		C243_Teleocichla_centrarchus						MW584410	Rio Xingu, main river below Cachoeira Grande, 3° 8'48.90"S, 51°39'23.70"W
		C581_Teleocichla_centrarchus_Xingu_Cachoeira_Grande					MW563568		Rio Xingu, main river below Cachoeira Grande, 3° 8'48.90"S, 51°39'23.70"W
Crenicichla notophthalmus Regan, 1913 (valid)	notophthalmus	C680_Crenicichla_notophthalmus	1	1	1	1	MW563646		Rio Amazonas drainage, Rio Uatumá, S 02 04 06.0, W 59 22 38.6
Crenicichla cf. notophthalmus Caroni	cf. notophthalmus Caroni (cf. regani Orinoco)	I80_Crenicichla_cf_regani_Mayupa	1	1	1	1	MW563667	MW554896	Rio Caroní drainage, Rio Carrao above Canaima falls, Mayupa, N 06º12'45.4", W 062º47'31"
		C253_Crenicichla_cf_notophthalmus_Caroni					MW563412		Rio Caroní drainage, Rio Carrao tributary above Canaima falls, Mayupa, N 6°14'50.81", W 62°48'13.15"
		II3_Crenicichla_cf_regani_Mayupa						MW584411	Rio Caroní drainage, Rio Carrao above Canaima falls, Mayupa, N 06º12'45.4", W 062º47'31"
Crenicichla cf. notophthalmus Ventuari	cf. notophthalmus Ventuari (sp. Orinoco)	C492_Crenicichla_cf_notophthalmus_Laguna_Camp_Lamani	1	1	1	1	MW563495		Rio Ventuari, Manapiare, Camp Lamani, 5°17'17" N, 66° 3'55" W
		C493_Crenicichla_cf_notophthalmus_Manapiare					MW563496		Rio Ventuari, Manapiare, 5°17'16.67" N, 66° 3'54.99" W
Crenicichla cf. notophthalmus Inirida	(cf. notophthalmus Colombia)	C255_Crenicichla_cf_regani_Kolumbien	1	2	2	1	MW563414		Rio Orinoco drainage, Inirida, 3°54'25.17"N, 67°54'44.24"W
	cf. notophthalmus Inirida (cf. regani Orinoco)	II75_Crenicichla_cf_regani_Orinoco					JF520091.1	JF519957.1	Piálek et al., 2012
Crenicichla compressiceps Ploeg, 1986 (valid)	compressiceps	C267_Crenicichla_compressiceps	1	2	2	1	MW563425		Rio Tocantins, Marabá, 5.3194650S, 49.0857183W
		C662_Crenicichla_compressiceps_Lajeado					MW563636		Rio Tocantins, Lajeado, 9°45'5.79" S, 48°21'51.99" W
Crenicichla cf. regani Amazon	cf. regani Manacapuru (cf. regani Amazon)	C642_Crenicichla_cf_regani_Manacapuru	1	1	1	1	MW554714		Manacapuru, Amazonas, 3°17'33.41" S, 60°38'31.33"W
Crenicichla wallacii Regan, 1905 (valid)	wallacii	C574_Crenicichla_wallacii	1	2	2	1	MW563562		Rio Essequibo, small tributary, 3°56'47.80"N, 59°15'32.83"W
		C573_Crenicichla_wallacii					MW563561		Rio Essequibo, small tributary, 3°56'47.80"N, 59°15'32.83"W
Crenicichla cf. regani Tocantins	cf. regani Tocantins	C645_Crenicichla_cf_regani_Tocantins	1	1	1	1	MW563622		Rio Tocantins, Lajeado, 9°45'5.79" S, 48°21'51.99" W
Crenicichla cf. regani Lower Tapajos	cf. regani Lower Tapajos (cf regani Santarem)	C245_Crenicichla_regani_Tapajos	1	1	1	1	MW563405		Rio Tapajos, Santarem, 2°25'32.27"S, 54°45'32.10"W
		C575_Crenicichla_cf_wallacii_group					MW563563		Piálek et al., 2012
		C644_Crenicichla_regani_Tapajos					MW563621		Rio Tapajos, Santarem, 2°25'32.27"S, 54°45'32.10"W
		C265_Crenicichla_regani_Tapajos					MW563423		Rio Tapajos, Santarem, 2°25'32.27"S, 54°45'32.10"W
		C684_Crenicichla_regani_Trombetas					MW563648		Rio Trombetas, below Cachoiera Porteira, 1° 5'15.20"S, 57° 2'40.30"W
Crenicichla zebrina Montana et al., 2008 (valid)	zebrina	C577_Crenicichla_zebrina	1	1	1	1	MW563564		Rio Orinoco drainage, lower Rio Ventuari, 4°11'7.68"N, 66°31'0.19"W
		C522_Crenicichla_zebrina_male					MW563520		Rio Orinoco drainage, lower Rio Ventuari, 4°11'7.68"N, 66°31'0.19"W
		C523_Crenicichla_zebrina_male					MW563521		Rio Orinoco drainage, lower Rio Ventuari, 4°11'7.68"N, 66°31'0.19"W
Crenicichla cf. johanna Peru	cf. johanna Peru	C616_Crenicichla_johanna_Itaya	1	1	2	2	MW563597		Amazon river drainage, Rio Itaya, 4°13'31.18"S, 73°28'57.45"W
		C233_Crenicichla_johanna_Peru					MW563402	MW554766	Amazon river drainage, Rio Ampiyacu mouth, Pebas, 3°19'39.30"S, 71°51'5.78"W
		C232_Crenicichla_johanna_Peru					MW563401	MW554765	Amazon river drainage, Rio Ampiyacu mouth, Pebas, 3°19'39.30"S, 71°51'5.78"W
		C238_Crenicichla_cf_johanna_Colombia					MW563404	MW554768	Amazon river drainage, Puerto Nariño, 3°47'8.23"S, 70°21'46.65"W
Crenicichla cf. johanna Ventuari	cf. johanna Ventuari	C489_Crenicichla_cf_johanna_Ventuari_spotted	1	2	2	1	MW563492		Rio Orinoco drainage, Rio Ventuari, Manapiare, 5°17'16.67" N, 66° 3'54.99" W
		C488_Crenicichla_cf_johanna_Autana					MW563491		Rio Orinoco drainage, Rio Autana, 4°46'43.29"N, 67°24'45.24"W
		C487_Crenicichla_cf_johanna_Autana					MW563490		Rio Orinoco drainage, Rio Autana, 4°46'43.29"N, 67°24'45.24"W
Crenicichla cf. johanna Orinoco	cf. johanna Orinoco (cf. johanna Inirida)	II66_Crenicichla_cf_johanna_Orinoco	1	1	1	1	MW563675	MW554902	Rio Orinoco, San Fernando de Atabapo, 4° 3'20.65"N, 67°41'38.98"W
		C502_Crenicichla_cf_johanna_Inirida					MW563503		Rio Orinoco drainage, Inirida, 3°54'25.17"N, 67°54'44.24"W
		C490_Crenicichla_cf_johanna_Inirida					MW563493		Rio Orinoco drainage, Inirida, 3°54'25.17"N, 67°54'44.24"W
Crenicichla cf. fasciata Demini	cf. johanna Demini (cf. fasciata Demini)	C619_Crenicichla_cf_johanna_Demini	1	1	1	1	MW563600		Rio Negro drainage, Rio Demini, 0°37'15.94"S, 62°52'37.84"W
Crenicichla cf. johanna Lower Tapajos	cf. johanna Lower Tapajos (cf. johanna Santarem)	C620_Crenicichla_cf_johanna_Trombetas	1	1	1	1	MW563601		Rio Trombetas, below Cachoiera Porteira, 1° 5'15.20"S, 57° 2'40.30"W
		C618_Crenicichla_cf_johanna_Santarem					MW563599		Rio Tapajos, Santarem, 2°25'32.27"S, 54°45'32.10"W
		C207_Crenicichla_cf_johanna_Rio_Branco					MW563384	MW554747	Rio Branco drainage, Boa Vista, 2°47'47.71"N, 60°39'55.74"W
		C617_Crenicichla_cf_johanna_Santarem					MW563598		Rio Tapajos, Santarem, 2°25'32.27"S, 54°45'32.10"W
Crenicichla aff. obtusirostris Cameta	aff. obtusirostris Cameta	C669_Crenicichla_cf_johanna_Cameta	1	1	2	1	MW563640		Rio Tocantins, Cameta, 2°15'28.27"S, 49°30'7.98"W
Crenicichla obtusirostris Günther, 1862 (synonym)	obtusirostris	C236_Crenicichla_cf_johanna_Rio_Araguaia					MW563403	MW554767	Rio Araguaia, Cachoeira Santa Isabel, 6° 9'52.05"S, 48°25'16.56"W
		C223_Crenicichla_cf_johanna_obtusirostris_Araguaia					MW563394	MW554757	Rio Araguaia, Cachoeira Santa Isabel, 6° 9'52.05"S, 48°25'16.56"W
Crenicichla cf. johanna Middle Tapajos	aff. johanna Lower Tapajos	C671_Crenicichla_cf_johanna_Santarem	1	2	2	1	MW563641		Rio Tapajos, Santarem, 2°25'32.27"S, 54°45'32.10"W
	cf. johanna Middle Tapajos (cf. johanna Sao Luis do Tapajos)	C591_Crenicichla_cf_lugubris_Tapajos					MW563576		Rio Tapajos, Sao Luis do Tapajos, 4°27'31.78"S, 56°15'8.77"W
		C585_Crenicichla_cf_johanna					MW563571		Rio Tapajos, Sao Luis do Tapajos, 4°27'31.78"S, 56°15'8.77"W
Crenicichla cf. lugubris Caroni	cf. lugubris Caroni	C261_Crenicichla_cf_lugubris_Caroni	1	1	1	1	MW563419		Rio Orinoco drainage, Rio Caroní, 8°19'2.92"N, 62°40'2.10"ZW
Crenicichla cf. lugubris Orinoco	cf. lugubris Orinoco (cf. lugubris red)	C515_Crenicichla_cf_lugubris_Red	1	1	1	1	MW563516		Rio Orinoco, Caicara del Orinoco, 7°37'55.50"N, 66°10'47.78"W
Crenicichla cf. lugubris Caura	cf. lugubris Caura (sp. Caura 1)	I1_Crenicichla_sp_Caura_1	1	1	1	1	MW563663	MW554893	Rio Caura drainage, Rio Nichare, camp Washadi, N 06º32'43.8", W 064º49'50.2"
		I34_Crenicichla_sp_Caura_1					MW563665	MW554895	Rio Caura drainage, Rio Nichare, camp Dos Invalidos, N 06º00'37.7", W 064º59'27.9"
		C266_Crenicichla_cf_lugubris_Caura					MW563424		Rio Caura drainage, Rio Nichare, camp Dos Invalidos, N 06º00'37.7", W 064º59'27.9"
Crenicichla cf. lugubris Atabapo-Ventuari	sp. cf. lugubris Atabapo-Ventuari	C503_Crenicichla_cf_lugubris_Atabapo_Chamuchina	1	1	1	1	MW563504		Rio Atabapo, San Fernando de Atabapo, 4° 1'22.89" N, 67°41'44.62" W
		C505_Crenicichla_cf_lugubris_Ventuari_male					MW563506		Rio Ventuari, Manapiare, 5°17'16.67" N, 66° 3'54.99" W
		C513_Crenicichla_cf_lugubris_Atabapo_Red					MW563514		Rio Atabapo, San Fernando de Atabapo, 4° 1'22.89" N, 67°41'44.62" W
		C514_Crenicichla_cf_lugubris_Atabapo_Red					MW563515		Rio Atabapo, San Fernando de Atabapo, 4° 1'22.89" N, 67°41'44.62" W
		C504_Crenicichla_cf_lugubris_Ventuari_Female					MW563505		Rio Ventuari, Manapiare, 5°17'16.67" N, 66° 3'54.99" W
		C491_Crenicichla_cf_lugubris_Oberlauf_Ventuari_Manapiare					MW563494		Rio Ventuari, Manapiare, 5°17'16.67" N, 66° 3'54.99" W
Crenicichla sp. Atabapo	sp. Atabapo	C263_Crenicichla_sp_Atabapo	1	1	1	1	MW563421		Rio Atabapo, San Fernando de Atabapo, 4° 1'22.89" N, 67°41'44.62" W
Crenicichla lugubris Heckel, 1840 (valid)	lugubris	C276_Crenicichla_lugubris	1	1	1	1	MW563434		Rio Negro, Manaus, 3° 3'13.00"S, 60° 6'50.45"W
Crenicichla cf. lugubris Western Amazon	cf. lugubris W Amazon (cf. lugubris Santarem)	C631_Crenicichla_cf_lugubris_Putumayo	1	1	2	1	MW563612		Rio Putumayo, Tarapacá, 2°53'28.46"S, 69°44'3.54"W
		II63_Crenicichla_cf_lugubris_Tapajos					MW563673		Rio Tapajos, Santarem, 2°25'32.27"S, 54°45'32.10"W
		C633_Crenicichla_cf_lugubris_Santarem_little_caudal_spot					MW563614		Rio Tapajos, Santarem, 2°25'32.27"S, 54°45'32.10"W
		C632_Crenicichla_cf_lugubris_Santarem_big_caudal_spot					MW563613		Rio Tapajos, Santarem, 2°25'32.27"S, 54°45'32.10"W
		C630_Crenicichla_cf_lugubris_Maici					MW563611		Rio Madeira drainage, Rio Maici, 7°48'26.88"S, 62°20'40.76"W
Crenicichla cf. lugubris Tocantins	cf. lugubris Araguaia-Tocantins	C628_Crenicichla_cf_lugubris_Tocantins_m	1	1	2	1	MW563609		Rio Tocantins, Lajeado, 9°45'5.79" S, 48°21'51.99" W
		C678_Crenicichla_cf_lugubris_Lajeado					MW563644		Rio Tocantins, Lajeado, 9°45'5.79" S, 48°21'51.99" W
		C634_Crenicichla_cf_lugubris_Araguaia_L					MW563615		Rio Araguaia, Cachoeira Santa Isabel, 6° 9'52.05"S, 48°25'16.56"W
		C624_Crenicichla_cf_lugubris_Araguaia_m					MW563605		Rio Araguaia, Cachoeira Santa Isabel, 6° 9'52.05"S, 48°25'16.56"W
Crenicichla rutilans (Jardine, 1843)	rutilans (cf. lugubris Branco)	C635_Crenicichla_cf_lugubris_Roraima	1	1	1	1	MW563616		Rio Branco drainage, Boa Vista, 2°47'47.71"N, 60°39'55.74"W
		C629_Crenicichla_cf_lugubris_Branco					MW563610		Rio Branco drainage, Boa Vista, 2°47'47.71"N, 60°39'55.74"W
Crenicichla cf. marmorata Curua	cf. marmorata Curua (cf. lugubris Curua)	C187_Crenicichla_cf_marmorata_Curua		1	2		MW563370	MW554737	Rio Amazon drainage, Rio Curua-Una, 2°47'39.90"S, 54°17'43.53"W
Crenicichla aff. lugubris Jatapu	aff. lugubris Jatapu	C626_Crenicichla_cf_lugubris_Jatapu_sm					MW563607		Rio Amazon drainage, Rio Jatapu, 1°44'29.38"S, 58°31'9.25"W
		C625_Crenicichla_cf_lugubris_Jatapu_md					MW563606		Rio Amazon drainage, Rio Jatapu, 1°44'29.38"S, 58°31'9.25"W
Crenicichla marmorata Pellegrin, 1904 (valid)	marmorata	II65_Crenicichla_marmorata		1	2		MW563674	MW554901	Rio Trombetas, below Cachoiera Porteira, 1° 5'15.20"S, 57° 2'40.30"W
		II70_Crenicichla_marmorata					JF520056.1	JF519922.1	Piálek et al., 2012
		C639_Crenicichla_marmorata					MW563620		Rio Trombetas, below Cachoiera Porteira, 1° 5'15.20"S, 57° 2'40.30"W
		C638_Crenicichla_marmorata_Curua					MW563619		Rio Amazon drainage, Rio Curua-Una, 2°47'39.90"S, 54°17'43.53"W
		C637_Crenicichla_marmorata_Arapiuns					MW563618		Rio Tapajos drainage, Rio Arapiuns, 2°39'10.29"S, 55°43'9.17"W
		C188_Crenicichla_cf_marmorata_Xingu					MW563371	MW554738	Rio Xingu, Belo Monte II, 3° 7'37.51"S, 51°41'45.17"W
Crenicichla cf. lugubris Xingu	cf. lugubris Xingu (sp. Xingu II)	C582_Crenicichla_sp_Xingu_II_cf_lugubris_Xingu	1	1	2	1	MW563569		Rio Xingu, isolated pool below Cachoeira Grande, 3° 8'48.90"S, 51°39'23.70"W
		II79_Crenicichla_sp_Xingu_II					MW563682		Rio Xingu, Balneario Pedral, 3°15'21.90"S, 52°13'8.10"W
		II76_Crenicichla_sp_Xingu_II					MW563679	MW554906	Rio Xingu, Balneario Pedral, 3°15'21.90"S, 52°13'8.10"W
Crenicichla percna Kullander, 1991 (valid)	percna	C651_Crenicichla_percna_INPA_40074	1	1	1	1	MW563627		Altamira, Pará, lat: -3.20333 long: -52.2064 err: ±748499 WGS84
		C652_Crenicichla_percna_INPA_40131					MW563628		Altamira, Pará, lat: -3.20333 long: -52.2064 err: ±748499 WGS84
Crenicichla dandara Varella & Ito, 2018 (valid)	dandara (sp. Xingu III = sp. preta)	C650_Crenicichla_sp_preta_ANSP_193066	1	1	1	1	MW563626		Rio Xingu, Volta Grande, Praia do Caju and rock outcrops upstream of Cachoeira do Jericoá, ca. 55 km east-southeast of Altamira Pará, Brazil
		C655_Crenicichla_sp_preta_ANSP_194699					MW563631		Rio Xingu, lower Volta Grande, near confluence of main straight channel running from south-southwest to north-northeast and smaller straight channel running from west to east., -3.47221994400024, -51.1977996826172 err: ±187945 WGS84]
Crenicichla sp. Xingu I	sp. Xingu I	C598_Crenicichla_sp_Xingu_I	1	1	1	1	MW563583		Rio Xingu, Cutuvelo, 3°17'22.49" S, 52° 3'45.31"W
		II72_Crenicichla_sp_Xingu_I					MW563677	MW554904	Rio Xingu, Balneario Pedral, 3°15'21.90"S, 52°13'8.10"W
Crenicichla cf. lugubris Tapajos II	cf. lugubris Tapajos II (Itaituba)	C590_Crenicichla_sp_aff_lugubris_Tapajos_Itaituba	1	1	1	1	MW563575		Rio Tapajos, Itaituba, 4°16'33.82"S, 56° 0'17.90"W
		C584_Crenicichla_sp_aff_lugubris_Tapajos_Itaituba					MW563570		Rio Tapajos, Itaituba, 4°16'33.82"S, 56° 0'17.90"W
		C174_Crenicichla_sp_aff_lugubris_Tapajos_II_Itaituba					MW563364		Rio Tapajos, Itaituba, 4°16'33.82"S, 56° 0'17.90"W
Crenicichla cf. lugubris Tapajos I	cf. lugubris Tapajos I (Alter do Chao)	II62_Crenicichla_sp_Tapajos_I_Alter do Chao	1	1	1	1	MW563672	MW554900	Rio Tapajos, Alter do Chao, 2°30'29.99"S, 54°57'44.12"W
		C183_Crenicichla_cf_lugubris_Tapajos_I					MW563368	MW554736	Rio Tapajos, Alter do Chao, 2°30'29.99"S, 54°57'44.12"W
		C627_Crenicichla_cf_lugubris_Tapajos					MW563608		Rio Tapajos, Alter do Chao, 2°30'29.99"S, 54°57'44.12"W
Crenicichla cf. strigata Middle Amazon	cf. strigata Middle Amazon	C473_Crenicichla_cf_lenticulata	1	1	1	1	MW554711		Rio Amazonas, Itacoatiara, 3° 8'29.16"S, 58°27'27.84"W
		C192_Crenicichla_cf_lenticulata_Rio_Urucara					MW563374		Rio Amazonas drainage, Urucara, 2°31'32.25"S, 57°46'18.82"W
		C273_Crenicichla_cf_lenticulata_cf_strigata					MW563431		Rio Amazonas, Itacoatiara, 3° 8'29.16"S, 58°27'27.84"W
Crenicichla cf. lenticulata Orinoco	cf. lenticulata Orinoco	C196_Crenicichla_cf_lenticulata_Orinoco	1	1	1	1	MW563378		Rio Orinoco drainage, Inirida, 3°54'25.17"N, 67°54'44.24"W
Crenicichla lenticulata Heckel, 1840 (valid)	lenticulata	C623_Crenicichla_cf_lenticulata_Uatuma	1	1	1	1	MW563604		Rio Amazonas drainage, Rio Uatuma, 2° 4'5.97"S, 59°22'38.63"W
		C676_Crenicichla_cf_lenticulata_Uatuma					MW563643		Rio Amazonas drainage, Rio Uatuma, 2° 4'5.97"S, 59°22'38.63"W
		C622_Crenicichla_lenticulata_Rio_Branco					MW563603		Rio Branco drainage, Boa Vista, 2°47'47.71"N, 60°39'55.74"W
		II68_Crenicichla_lenticulata					JF520022.1	JF519888.1	Piálek et al., 2012
		C193_Crenicichla_cf_lenticulata_Rio_Uatuma					MW563375		Rio Amazonas drainage, Rio Uatuma, 2° 4'5.97"S, 59°22'38.63"W
		C191_Crenicichla_lenticulata_Rio_Preto					MW563373		Rio Amazonas drainage, Rio Preto de Eva, 2°52'10.47"S, 59°33'50.60"W
Crenicichla acutirostris Günther, 1862 (valid)	acutirostris	C218_Crenicichla_acutirostris	1	1	1	1	MW563390	MW554753	Rio Tapajos, Sao Luis do Tapajos, 4°27'31.78"S, 56°15'8.77"W
Crenicichla multispinosa Pellegrin, 1903 (valid)	multispinosa	C209_Crenicichla_multispinosa	1	1	1	1	MW563386	MW554749	Rio Maroní, Apatou, 5° 8'37.35"N, 54°20'39.79"W
Crenicichla ternetzi Norman, 1926 (valid)	ternetzi	C260_Crenicichla_ternetzi	1	1	1	1	MW563418		Rio Oyapock, St. Georges, 3°52'55.71"N, 51°48'22.47"W
Crenicichla cincta Regan, 1905 (valid)	cincta	C605_Crenicichla_cincta_Tapiche	1	1	1	1	MW563589		Rio Tapiche, village above Requena, 5°10'12.44"S, 73°51'57.20"W
		C208_Crenicichla_cincta					MW563385	MW554748	Rio Tapiche, village above Requena, 5°10'12.44"S, 73°51'57.20"W
		C566_Crenicichla_cincta_Tapiche					MW563558		Rio Tapiche, village above Requena, 5°10'12.44"S, 73°51'57.20"W
		C567_Crenicichla_cincta_Tapiche					MW563559		Rio Tapiche, village above Requena, 5°10'12.44"S, 73°51'57.20"W
Crenicichla cf. anthurus Napo-Putumayo	cf. anthurus Napo-Putumayo	C562_Crenicichla_sp_saxatilis_group_Equador	1	3	3	1	MW563556		Rio Napo, Coca, 0°28'2.47"S, 76°57'33.39"W
		C602_Crenicichla_sp_cf_anthurus_Putumayo					MW563587		Rio Putumayo, Puerto el Carmen, 0° 6'51.18"N, 75°52'1.62"W
		C561_Crenicichla_sp_saxatilis_group_Equador					MW563555		Rio Napo, Coca, 0°28'2.47"S, 76°57'33.39"W
Crenicichla sp. Caura 2	sp. Caura 2	I22_Crenicichla_sp_Caura_2	1	1	1	1	MW563664	MW554894	Rio Caura drainage, Rio Nichare, left tributary below camp Dos Invalidos, N 06º00'37.7", W 064º59'27.9"
Crenicichla sp. Inirida II	sp. Inirida II	C509_Crenicichla_sp_Inirida_II	1	1	1	1	MW563510		Rio Orinoco drainage, Inirida, 3°54'25.17"N, 67°54'44.24"W
Crenicichla sp. Inirida III	sp. Inirida III	C269_Crenicichla_sp_Inirida_III	1	1	1	1	MW563427		Rio Orinoco drainage, Inirida, 3°54'25.17"N, 67°54'44.24"W
		C250_Crenicichla_sp_Inirida_III					MW563410		Rio Orinoco drainage, Inirida, 3°54'25.17"N, 67°54'44.24"W
Crenicichla cf. alta Caroni	cf. alta Caroni	II23_Crenicichla_cf_alta_Yuruani	1	1	1	1	MW563669	MW554898	Rio Caroní drainage, Rio Yuruani, Laguna below Salto Yuruani, N 05º05'16.2", W 061º05'52.4"
		II47_Crenicichla_cf_alta_Kama					MW563670	MW584412	Rio Caroní drainage, Rio Aponguao below Salto Kamá, N 05º24'36.4", W 061º13'26.2"6
Crenicichla aff. alta Caroni	aff. alta Caroni	II14_Crenicichla_cf_alta_Rio_Kukurital	1	1	1	1	MW563668	MW554897	Rio Caroní drainage, Rio Kukurital, N 06º09'43.4", W 062º51'31.4"
		I45_Crenicichla_cf_alta_salto_Hacha					MW563666		Rio Caroní drainage, Rio Carrao bellow Canaima falls, laguna below Salto Hacha, N 06º15'06.5", W 062º50'51.5"
Crenicichla sveni Ploeg, 1991 (valid)	sveni	C230_Crenicichla_sveni	1	1	2	1	MW563399	MW554763	Rio Meta drainage, Puerto Gaitan, 4°18'31.20"N, 72° 4'44.74"W
		C521_Crenicichla_sveni					MW563519		Rio Meta drainage, Puerto Gaitan, 4°18'31.20"N, 72° 4'44.74"W
	cf. sveni Guaniamo-Guariquito	II71_Crenicichla_cf_lepidota_Guariquito					MW563676	MW554903	Rio Orinoco drainage, Rio Guariquito tributary, 8°37'26.93"N, 66°26'16.18"W
		C254_Crenicichla_cf_sveni_Caura					MW563413		Rio Caura drainage, Rio Nichare, camp Washadi, N 06º32'43.8", W 064º49'50.2"
	cf. sveni Caura	C252_Crenicichla_sp_Rio_Caura					MW563411		Rio Caura drainage, Rio Nichare, camp Washadi, N 06º32'43.8", W 064º49'50.2"
Crenicichla aff. anthurus Napo	aff. anthurus Napo	C563_Crenicichla_sp_saxatilis_group_Equador	1	1	1	1	MW563557		Rio Napo, Coca, 0°28'2.47"S, 76°57'33.39"W
Crenicichla anthurus Cope, 1871 (valid)	anthurus	C257_Crenicichla_anthurus	1	1	1	1	MW563416		Amazon river drainage, Rio Ampiyacu mouth, Pebas, 3°19'39.30"S, 71°51'5.78"W
		C264_Crenicichla_anthurus					MW563422		Amazon river drainage, Rio Ampiyacu mouth, Pebas, 3°19'39.30"S, 71°51'5.78"W
Crenicichla cf. ploegi Teles Pires	cf. ploegi Teles Pires	C227_Crenicichla_cf_guentheri_hemera_Teles_Pires	1	1	1	1	MW563398	MW554761	Rio Tapajos drainage, Rio Cristalino tributary, 9°35'51.97"S, 55°55'53.05"W
Crenicichla semicincta Steindachner, 1892 (valid)	semicincta	C693_Crenicichla_semicincta_Madre_de_Dios	1	1	1	1	MW563653		Rio Madre de Dios at border, 12°30'13.49"S, 68°39'33.98"W
Crenicichla sp. Inirida I	sp. Inirida I (sp. Sipapo-Ventuari I)	C506_Crenicichla_sp_Inirida_I_Sipapo	1	1	1	1	MW563507		Rio Sipapo tributary below Pendare, 4°55'8.50"N, 67°44'31.85"W
		C507_Crenicichla_sp_Inirida_I_Sipapo					MW563508		Rio Sipapo tributary below Pendare, 4°55'8.50"N, 67°44'31.85"W
Crenicichla sp. Inirida II	sp. Inirida II (sp. Sipapo-Ventuari II)	C511_Crenicichla_sp_Inirida_II_Manapiare	1	1	1	1	MW563512		Rio Ventuari, Manapiare, 5°17'16.67" N, 66° 3'54.99" W
		C508_Crenicichla_sp_Inirida_I_Oberlauf_Ventuari_Manapiare					MW563509		Rio Ventuari, Manapiare, 5°17'16.67" N, 66° 3'54.99" W
		C510_Crenicichla_sp_Inirida_II_Laguna					MW563511		Rio Ventuari, Manapiare laguna, 5°17'17.43"N, 66° 3'28.30"W
Crenicichla cf. semicincta Bolivia	cf. semicincta Bolivia	C64_Crenicichla_cf_semicincta_Bolivia_Beni	1	2	2	1	MW563347	MW554723	Rio Beni tributary below Rurrenabaque, 14°24'4.03"S, 67°31'6.92"W
		C75_Crenicichla_cf_semicincta_Bolivia_Tahuamanu					MW563349		Rio Tahuamanu tributary, 11°16'18.75"S, 68°44'20.44"W
Crenicichla cf. lepidota Guapimirim	cf. lepidota Guapimirim (cf. edithae Rio de Janeiro)	C194_Crenicichla_cf_lepidota_Guapimirim_Rio_de_Janeiro	1	1	1	1	MW563376	MW554740	Rio Soberbo at Guapimirim, 22°30'48.38"S, 42°57'40.25"W
Crenicichla isbrueckeri Ploeg, 1991 (valid)	isbrueckeri	C226_Crenicichla_isbrueckeri_Rio_Aripuana	1	1	1	1	MW563397	MW554760	Rio Aripuana below Aripuana, 10° 8'36.27"S, 59°25'55.83"W
Crenicichla cf. lepidota Tapajos	cf. lepidota Tapajos (cf. lepidota Juruena)	C224_Crenicichla_cf_lepidota_Juruina_Tapajos	1	1	1	1	MW563395	MW554758	Rio Tapajos drainage, Rio Juruena at Juina, 11°20'36.94"S, 58°20'5.09"W
Crenicichla britskii Kullander, 1982 (valid)	britskii	C660_Crenicichla_britskii		1	1	0	MW584407		Rio Paraná drainage, Ribeirao da Ave Maria close to mouth into Rio Tieté, 22°20'32.10"S, 48°42'10.27"W
Crenicichla cf. lepidota Teles Pires	cf. lepidota Teles Pires	C228_Crenicichla_cf_lepidota_Teles_Pires		0	1	0		MW554762	Rio Tapajos drainage, Rio Cristalino tributary, 9°35'51.97"S, 55°55'53.05"W
Crenicichla sp. Sinop	sp. Xinops	C225_Crenicichla_sp_Xinops_Rio_Juruina	1	1	1	1	MW563396	MW554759	Rio Tapajos drainage, Rio Juruena tributary, 11°29'42.26"S, 57°24'26.40"W
Crenicichla cf. lepidota Xingu	cf. lepidota Xingu	II73_Crenicichla_cf_lepidota_Xingu	1	1	1	1	MW563678	MW554905	Rio Xingu, small tributary in Altamira, 3°12'0.21"S, 52°11'43.05"W
		II78_Crenicichla_cf_lepidota_Xingu					MW563681	MW554908	Rio Xingu, small tributary in Altamira, 3°12'0.21"S, 52°11'43.05"W
		II80_Crenicichla_cf_saxatilis_Xingu					MW563683	MW554909	Rio Xingu, small tributary in Altamira, 3°12'0.21"S, 52°11'43.05"W
		II77_Crenicichla_cf_saxatilis_Xingu					MW563680	MW554907	Rio Xingu, small tributary in Altamira, 3°12'0.21"S, 52°11'43.05"W
Crenicichla edithae Ploeg, 1991	edithae	C55_Crenicichla_lepidota_Salto_3de_Mayo	1	1	1	1	MW563344	MW554722	Rio Paraná drainage, Salto 3de Mayo, 26°45'31.5" S, 54°55'28.1" W
		C3_Crenicichla_lepidota_Deseado					JF520023.1	JF519889.1	Piálek et al., 2012
		C42_Crenicichla_lepidota_Paranay_Guazu					MW563340		Rio Paraná drainage, Arroyo Paranay Guazu, 26°48'27.1" S, 54°45'37.7" W
		C43_Crenicichla_lepidota_Paranay_Guazu					MW563341	MW554720	Rio Paraná drainage, Arroyo Paranay Guazu, 26°48'27.1" S, 54°45'37.7" W
		C46_Crenicichla_lepidota_Cunapiru					JF520026.1	JF519892.1	Piálek et al., 2012
		C93_Crenicichla_lepidota_Guaruhape					MW563357		Rio Paraná drainage, Arroyo Garuhapé, 26°53'02.1" S, 54°53'32.6" W
		C53_Crenicichla_lepidota_Guaruhape					JF520027.1	JF519893.1	Piálek et al., 2012
		C47_Crenicichla_lepidota_Cunapiru					MW563342	MW554721	Rio Paraná drainage, Arroyo Cunapiru, 27°05'18.7" S, 54°57'07.5" W
		C50_Crenicichla_lepidota_Tucangua					MW563343		Rio Paraná drainage, Arroyo Tucangua/Cunapiru, 27°02'18.5" S, 55°02'14.1" W
		C54_Crenicichla_lepidota_Salto_3de_Mayo					JF520028.1	JF519894.1	Piálek et al., 2012
Crenicichla aff. edithae Iguazu	aff. edithae Iguazu	C7_Crenicichla_lepidota_affluent_Iguazu	1	1	1	1	JF520024.1	JF519890.1	Piálek et al., 2012
Crenicichla aff. edithae M. Paraná-Uruguay-Pantanal	aff. edithae M. Paraná-Uruguay-Pantanal	DNA7_Crenicichla_edithae	1	1	1	1	MW563661	MW554891	Rio Uruguay drainage, Arroyo Patria, 27°45'57.4" S, 55°09'33.7" W
		C35_Crenicichla_lepidota_Guerrero					MW563339		Rio Uruguay drainage, Arroyo Patria, 27°45'57.4" S, 55°09'33.7" W
		C34_Crenicichla_lepidota_Guerrero					JF520025.1	JF519891.1	Piálek et al., 2012
		C78_Crenicichla_lepidota_Pantanal_Abobral					MW563350		Rio Paraguay basin, Rio Abobral, Pantanal, 19°25'57.67"S, 57° 3'10.41"W
		C274_Crenicichla_aff_saxatilis					MW563432		Rio Paraná drainage, Arroyo Tucangua/Cunapiru, 27°02'18.5" S, 55°02'14.1" W
		C479_Crenicichla_sp_Verduijn					MW563486		Rio Paraná drainage, Arroyo Tucangua/Cunapiru, 27°02'18.5" S, 55°02'14.1" W
		C92_Crenicichla_lepidota_Tucangua					MW563356		Rio Paraná drainage, Arroyo Tucangua/Cunapiru, 27°02'18.5" S, 55°02'14.1" W
		C60_Crenicichla_lepidota_Chapa					MW563345		Rio Paraná drainage, Arroyo Chapa, 27°17'42.0" S, 55°11'01.8" W
		C61_Crenicichla_lepidota_Chapa					MW563346		Rio Paraná drainage, Arroyo Chapa, 27°17'42.0" S, 55°11'01.8" W
		C478_Crenicichla_aff_saxatilis					MW563485		Rio Paraná drainage, Arroyo Chapa, 27°17'42.0" S, 55°11'01.8" W
Crenicichla labrina (Spix & Agassiz, 1931) (valid)	labrina	C675_Crenicichla_labrina	1	1	1	1	MW563642		Rio Amazon drainage, small stream E of Belem, 1°20'42.04"S, 48°15'4.22"W
Crenicichla sp. Rolo	sp. Rolo	C481_Crenicichla_sp_Rolo_male	1	1	1	0	MW563487		locality unknown
Crenicichla albopunctata Pellegrin, 1904 (valid)	albopunctata	C494_Crenicichla_albopunctata		1	1	1	MW563497		Rio Maroní, Apatou, small tributary, 5° 8'37.35"N, 54°20'39.79"W
		C495_Crenicichla_albopunctata					MW584404		Rio Maroní, Apatou, small tributary, 5° 8'37.35"N, 54°20'39.79"W
Crenicichla sp. Sao Francisco	sp. Sao Francisco	C690_Crenicichla_cf_saxatilis_Sao_Francisco	1	1	1	1	MW563652		Rio Sao Francisco, Represa de Tres Marias, 18°29'36.28"S, 45°16'56.85"W
		C689_Crenicichla_cf_saxatilis_Sao_Francisco					MW584408		Rio Sao Francisco, Represa de Tres Marias, 18°29'36.28"S, 45°16'56.85"W
Crenicichla cf. menezesi Gurupi	cf. menezesi Gurupi	C679_Crenicichla_cf_menezesi_Gurupi	1	1	1	1	MW563645		Rio Gurupi between Para and Maranhao, small tributary, 2° 9'24.60"S, 46°17'4.75"W
Crenicichla cf. saxatilis Fr Guiana	cf. saxatilis Fr Guiana	C516_Crenicichla_cf_saxatilis_Km_77		2	2	0	MW584405		Approuage river, small tributary at km 77, 4° 2'49.24"N, 52°28'19.69"W
		C519_Crenicichla_cf_saxatilis_Approuage_Km_131					MW584406		Approuage river, small tributary at km 131, 3°44'47.27"N, 52°38'13.45"W
Crenicichla cf. saxatilis Tocantins-Lajeado I	cf. saxatilis Tocantins-Lajeado I	C687_Crenicichla_cf_saxatilis_Lajeado	1	1	1	1	MW563650		Rio Tocantins, Lajeado, 9°45'5.79" S, 48°21'51.99" W
Crenicichla cf. alta Cuyuni	cf. alta Cuyuni	II54_Crenicichla_cf_alta_Las_Claritas	1	1	1	1	MW563671	MW554899	Rio Cuyuní drainage, Las Claritas, N 06º10'20.9", W 061º25'32.8"
		C248_Crenicichla_cf_alta_Tumeremo					MW563408		Rio Cuyuní drainage, Tumeremo, 7°18'46.76"N, 61°27'24.96"W
Crenicichla inpa Ploeg, 1991 (valid)	inpa	C278_Crenicichla_cf_inpa	1	2	2	1	MW563436		Rio Amazonas, Lago Janauacá, 3°28'43.66"S, 60°17'5.83"W
		C277_Crenicichla_cf_inpa					MW563435		Rio Amazonas, Lago Janauacá, 3°28'43.66"S, 60°17'5.83"W
Crenicichla cardiostigma Ploeg, 1991	cardiostigma (cf. alta Rio Branco)	C601_Crenicichla_cf_alta_Caroebe		1	1	0	MW563586		Rio Branco drainage, Caroebe, 0°52'55.71"N, 59°42'17.89"W
	sp. Manaus	C636_Crenicichla_sp_Manaus					MW563617		Rio Negro, Manaus, 2°59'23.88"S, 59°58'39.33"W
		C657_Crenicichla_cf_alta					MW563633		Rio Negro, Manaus, 2°59'23.88"S, 59°58'39.33"W
		C600_Crenicichla_cf_alta_adult					MW563585		Rio Negro, Manaus, 2°59'23.88"S, 59°58'39.33"W
Crenicichla sp. saxatilis group Colombia	sp. saxatilis group Colombia	C560_Crenicichla_sp_saxatilis_group_Colombia	1	2	2	1	MW563554		locality unknown
Crenicichla aff. inpa Manacapuru I	aff. inpa Manacapuru I	C611_Crenicichla_cf_inpa_Manacapuru					MW563593		Manacapuru, Amazonas, 3°17'33.41" S, 60°38'31.33"W
Crenicichla cf. alta Icana	cf. alta Icana	C203_Crenicichla_cf_saxatilis_Rio_Icana	1	1	1	1	MW563381	MW554744	Rio Negro basin, Rio Icana small tributary, 1°43'10.37"N, 69°21'51.72"W
Crenicichla aff. inpa Manacapuru II	aff. inpa Manacapuru II	C614_Crenicichla_cf_inpa_Manacapuru	1	1	1	0	MW563595		Rio Amazonas, Manacapuru,3°17'33.41" S, 60°38'31.33"W
Crenicichla cf. inpa Manacapuru	cf. inpa Manacapuru	C612_Crenicichla_cf_inpa_Manacapuru_spotted		1	1		MW563594		Rio Amazonas, Manacapuru,3°17'33.41" S, 60°38'31.33"W
		C613_Crenicichla_cf_inpa_Manacapuru_without_spots					MW554713		Rio Amazonas, Manacapuru,3°17'33.41" S, 60°38'31.33"W
Crenicichla cf. inpa	cf. inpa	C666_Crenicichla_cf_inpa_spotted_juvenile		1	1		MW563639		exact locality unknown
		C665_Crenicichla_cf_inpa_less_spotted_juvenile					MW563638		exact locality unknown
	aff. Inpa	C222_Crenicichla_cf_inpa			1		MW563393	MW554756	exact locality unknown
	cf. saxatilis Tapajos	C214_Crenicichla_cf_saxatilis_Itaituba_Tapajos			1		MW563387	MW554750	Rio Tapajos, Itaituba, 4°16'33.82"S, 56° 0'17.90"W
	cf. saxatilis Marajo	C648_Crenicichla_cf_saxatilis_Marajo					MW563625		Marajo island, small tributary to Rio Anajas close to Anajas, 0°58'37.61"S, 49°57'46.29"W
	cf. saxatilis Crique Morfio-Kaw Sombre	C270_Crenicichla_cf_saxatilis_Crique_Morfio			1		MW563428		Crique Morfio, Kaw, French Guiana, Kaw river small tributary, 4° 29′ 12″ N, 52° 2′ 13″ WFrench Guiana
		C219_Crenicichla_cf_saxatilis_Kaw_FG					MW563391	MW554754	Kaw, French Guiana, Kaw river small tributary, 4° 29′ 12″ N, 52° 2′ 13″ W
	cf. saxatilis Lajeado	C688_Crenicichla_cf_saxatilis_Lajeado_juvenile		1	1		MW563651		Rio Tocantins, Lajeado, 9°45'5.79" S, 48°21'51.99" W
	cf. saxatilis Anapu	C202_Crenicichla_cf_saxatilis_Rio_Anapu		1	1		MW563380	MW554743	Rio Amazonas drainage, Rio Anapu, small tributary by Anapu, 3°26'58.68"S, 51°11'46.42"W
	cf. saxatilis Kourou	C217_Crenicichla_cf_saxatilis_Rio_Curu		1	1		MW563389	MW554752	Kourou river, small forest stream, 5° 0'52.17"N, 52°41'58.81"W
	cf. saxatilis Oyapock	C256_Crenicichla_Oyapock					MW563415		Oyapock river by Oyapock, small tributary, 3°49'34.73"N, 51°50'28.75"W
	cf. saxatilis Organabo	C275_Crenicichla_cf_saxatilis_Organabo					MW563433		Crique Organabo, French Guiana, 5°33'0.60"N, 53°28'4.87"W
		C268_Crenicichla_cf_saxatilis_Organabo					MW563426		Crique Organabo, French Guiana, 5°33'0.60"N, 53°28'4.87"W
		C475_Crenicichla_cf_saxatilis_Organabo					MW563483		Crique Organabo, French Guiana, 5°33'0.60"N, 53°28'4.87"W
		C477_Crenicichla_cf_saxatilis_EO					MW563484		Crique Organabo, French Guiana, 5°33'0.60"N, 53°28'4.87"W
		C271_Crenicichla_cf_saxatilis_Organabo_Matabo					MW563429		Crique Organabo, Matabo, French Guiana, 5°33'0.60"N, 53°28'4.87"W
Crenicichla nickeriensis Ploeg, 1987 (valid)	nickeriensis	C486_Crenicichla_nickeriensis		1	1		MW563489		Mozes Creek, Nickerie river tributary, 4°51'20.87"N,56°47'13.83"W
Crenicichla saxatilis (Linnaeus, 1758) (valid)	saxatilis	C195_Crenicichla_saxatilis_Rio_Suriname					MW563377	MW554741	Suriname river, small tributary, 4°29'21.18"N, 55°22'35.45"W
		C189_Crenicichla_nickeriensis					MW563372	MW554739	Mozes Creek, Nickerie river tributary, 4°51'20.87"N,56°47'13.83"W
	cf. saxatilis Saramaca	C220_Crenicichla_cf. saxatilis_Rio_Saramacca					MW563392	MW554755	Saramacca river, small tributary, 4°56'9.74"N, 55°32'52.81"W
Crenicichla brasiliensis (Bloch, 1792)	brasiliensis	DNA10_Crenicichla_brasiliensis					MW563662	MW554892	Rio Jaguaribe tributary, 4°47'30.12"S, 37°44'43.66"W
Crenicichla cf. saxatilis Coppename	cf. saxatilis Coppename (cf. coppenamensis)	C249_Crenicichla_cf_saxatilis_Coppename					MW563409		Coppename river, small tributary, 5° 9'41.85"N, 56° 4'22.22"W
		C272_Crenicichla_cf_saxatilis_Coppename					MW563430		Coppename river, small tributary, 5° 9'41.85"N, 56° 4'22.22"W
Crenicichla cf. saxatilis Guyana	cf. saxatilis Guyana (cf. albopunctata)	C231_Crenicichla_cf_albopunctata					MW563400	MW554764	Guyana
		C656_Crenicichla_Achim_Janu					MW563632		Guyana
		C485_Crenicichla_cf_saxatilis					MW563488		Guyana
		C472_Crenicichla_sp_Gaertner_female					MW563481		Guyana
		C517_Crenicichla_cf_saxatilis					MW563517		Guyana
Crenicichla semifasciata (Heckel, 1840) (valid)	semifasciata	J7_Crenicichla_semifasciata_Corrientes	1	1	1	1	JF520095.1	JF519961.1	Piálek et al., 2012
Crenicichla cf. cyanonotus Cope, 1870 (valid)	cf. cyanonotus	C607_Crenicichla_cf_cyanonotus_Rio_Itonamas_2_Bolivia	1	1	1	1	MW563591		Rio Itonomas at Magdalena, 13°15'54.29"S, 64° 2'56.29"W
		C65_Crenicichla_cf_cyanonotus_Bolivia_Beni					MW563348		Rio Beni by laguna de Tumichucua, 11° 7'49.60"S, 66°11'47.46"W
		C71_Crenicichla_cf_cyanonotus_Bolivia_Mamore					JF519996.1	JF519862.1	Piálek et al., 2012
		C606_Crenicichla_cf_cyanonotus_Rio_Itonamas_1_Bolivia					MW563590		Rio Itonomas at Magdalena, 13°15'54.29"S, 64° 2'56.29"W
Crenicichla geayi Pellegrin, 1903 (valid)	geayi	C262_Crenicichla_geayi_Rio_Bocono	1	3	3	1	MW563420		Rio Orinoco basin, Rio Bocono, 8°42'32.31"N, 69°41'14.59"W
		I26_Crenicichla_geayi_Caura					JF520003.1	JF519869.1	Piálek et al., 2012
		C259_Crenicichla_geayi					MW563417		Rio Orinoco at Ciudad Bolivar, 8° 9'3.10"N, 63°36'2.59"W
		C499_Crenicichla_cf_geayi					MW563500		Rio Orinoco at Ciudad Bolivar, 8° 9'3.10"N, 63°36'2.59"W
Crenicichla punctulata Regan, 1905	punctulata	DNA2_Crenicichla_cf_reticulata_rio_Branco	1	1	1	1	JF520093.1	JF519959.1	Piálek et al., 2012
Crenicichla reticulata (Heckel, 1840) (valid)	reticulata	C685_Crenicichla_cf_reticulata_Jatapu	1	1	1	1	MW563649		Rio Amazon drainage, Rio Jatapu, 1°44'29.38"S, 58°31'9.25"W
		C646_Crenicichla_cf_reticulata_Santarem					MW563623		Rio Tapajos, Santarem, 2°25'32.27"S, 54°45'32.10"W
		C653_Crenicichla_reticulata_group_INPA_40746					MW563629		Porto de Moz, Pará, lat: -1.74833 long: -52.2383 err: ±154178 WGS84
		II67_Crenicichla_reticulata					JF520092.1	JF519958.1	Piálek et al., 2012
		C647_Crenicichla_cf_reticulata_Putumayo					MW563624		Rio Putumayo, Tarapacá, 2°53'28.46"S, 69°44'3.54"W
Crenicichla elegans Steindachner, 1881 (synonym)	elegans	C610_Crenicichla_elegans_s	1	1	1	1	MW563592		Iquitos, Peru
		C500_Crenicichla_elegans					MW563501		Iquitos, Peru
Crenicichla sp. Gurupi	sp. Gurupi	C664_Crenicichla_sp_Gurupi	1	1	1	1	MW563637		Rio Gurupi between Para and Maranhao, 2° 9'24.60"S, 46°17'4.75"W
Crenicichla stocki Ploeg, 1991 (valid)	stocki	C520_Crenicichla_stocki	1	1	1	1	MW563518		Tucurui, Pará, 3°45'12.83"S, 49°39'54.86"W
Crenicichla jegui Ploeg, 1986 (valid)	jegui	C615_Crenicichla_jegui	1	1	1	1	MW563596		Tucurui, Pará, 3°45'12.83"S, 49°39'54.86"W
Crenicichla cyclostoma Ploeg, 1986 (valid)	cyclostoma	C246_Crenicichla_cyclostoma	1	1	1	1	MW563406		Tucurui, Pará, 3°45'12.83"S, 49°39'54.86"W
Crenicichla cf. jegui	cf. jegui	C501_Crenicichla_cf_jegui	1	1	1	1	MW563502		Tucurui, Pará, 3°45'12.83"S, 49°39'54.86"W
		C512_Crenicichla_cf_jegui					MW563513		Tucurui, Pará, 3°45'12.83"S, 49°39'54.86"W
Crenicichla cametana Steindachner, 1911 (valid)	cametana	II64_Crenicichla_cametana	1	1	1	1	JF519991.1	JF519857.1	Piálek et al., 2012
		C498_Crenicichla_cametana					MW563499		Rio Tocantins, Cameta, 2°15'28.27"S, 49°30'7.98"W
		C497_Crenicichla_cametana					MW563498		Rio Tocantins, Cameta, 2°15'28.27"S, 49°30'7.98"W
Crenicichla macrophthalma Heckel, 1840 (valid)	macrophthalma	C654_Crenicichla_macrophthalma_INPA_40745	1	2	2	1	MW563630		Porto de Moz, Pará, lat: -1.74833 long: -52.2383 err: ±154178 WGS84
		II69_Crenicichla_macrophthalma_Trombetas					JF520029.1	JF519895.1	Piálek et al., 2012
Crenicichla aff. missioneira Lucena & Kullander, 1992 (valid)	aff. missioneira	C29_Crenicichla_missioneira_Paraiso_Yaboti	1	1	1	1	JF520075.1	JF519941.1	Piálek et al., 2012
		C320_Crenicichla_missioneira_Fortaleza						MW554810	Rio Uruguay basin, Arroyo Fortaleza, 26°45'56.6" S, 54°10'57.4" W
		C20_Crenicichla_missioneira_Fortaleza					JF520071.1	JF519937.1	Piálek et al., 2012
		C86_Crenicichla_missioneira_Fortaleza					MW563354	MW554726	Rio Uruguay basin, Arroyo Fortaleza, 26°45'56.6" S, 54°10'57.4" W
		C321_Crenicichla_missioneira_Fortaleza						MW554811	Rio Uruguay basin, Arroyo Fortaleza, 26°45'56.6" S, 54°10'57.4" W
		C19_Crenicichla_missioneira_Fortaleza					JF520070.1	JF519936.1	Piálek et al., 2012
		C317_Crenicichla_missioneira_Fortaleza						MW554807	Rio Uruguay basin, Arroyo Fortaleza, 26°45'56.6" S, 54°10'57.4" W
		C84_Crenicichla_missioneira_Fortaleza					MW563352	MW554724	Rio Uruguay basin, Arroyo Fortaleza, 26°45'56.6" S, 54°10'57.4" W
		C313_Crenicichla_missioneira_Fortaleza					MW563455	MW554803	Rio Uruguay basin, Arroyo Fortaleza, 26°45'56.6" S, 54°10'57.4" W
		C22_Crenicichla_missioneira_Fortaleza					MW563335	MW554716	Rio Uruguay basin, Arroyo Fortaleza, 26°45'56.6" S, 54°10'57.4" W
		C315_Crenicichla_missioneira_Fortaleza						MW554805	Rio Uruguay basin, Arroyo Fortaleza, 26°45'56.6" S, 54°10'57.4" W
		C85_Crenicichla_missioneira_Fortaleza					MW563353	MW554725	Rio Uruguay basin, Arroyo Fortaleza, 26°45'56.6" S, 54°10'57.4" W
		C310_Crenicichla_missioneira_Fortaleza					MW563452	MW554800	Rio Uruguay basin, Arroyo Fortaleza, 26°45'56.6" S, 54°10'57.4" W
Crenicichla igara Lucena & Kullander, 1992 (valid)	igara	C116_Crenicichla_igara_Forquilha	1	1	1	1	JF520011.1	JF519877.1	Piálek et al., 2012
		C117_Crenicichla_igara_Forquilha					JF520012.1	JF519878.1	Piálek et al., 2012
		C115_Crenicichla_igara_Forquilha					JF520010.1	JF519876.1	Piálek et al., 2012
Crenicichla jurubi Lucena & Kullander, 1992 (valid)	jurubi	C546_Crenicichla_jurubi_Canoas	1	1	1	1	MW563540	MW554885	Upper Uruguai drainage, Rio Caveiras, tributary of Rio Canoas, S27 51.820, W50 11.977
		C119_Crenicichla_missioneira_Forquilha					JF520069.1	JF519935.1	Piálek et al., 2012
		C549_Crenicichla_jurubi_Canoas					MW563543	MW554888	Upper Uruguai drainage, Rio Caveiras, tributary of Rio Canoas, S27 51.820, W50 11.977
		C551_Crenicichla_jurubi_Canoas					MW563545	MW554890	Upper Uruguai drainage, Rio Caveiras, tributary of Rio Canoas, S27 51.820, W50 11.977
		C545_Crenicichla_jurubi_Canoas					MW563539	MW554884	Upper Uruguai drainage, Rio Caveiras, tributary of Rio Canoas, S27 51.820, W50 11.977
		C548_Crenicichla_jurubi_Canoas					MW563542	MW554887	Upper Uruguai drainage, Rio Caveiras, tributary of Rio Canoas, S27 51.820, W50 11.977
		C544_Crenicichla_jurubi_Canoas					MW563538	MW554883	Upper Uruguai drainage, Rio Caveiras, tributary of Rio Canoas, S27 51.820, W50 11.977
		C550_Crenicichla_jurubi_Canoas					MW563544	MW554889	Upper Uruguai drainage, Rio Caveiras, tributary of Rio Canoas, S27 51.820, W50 11.977
		C543_Crenicichla_jurubi_Canoas					MW563537	MW554882	Upper Uruguai drainage, Rio Caveiras, tributary of Rio Canoas, S27 51.820, W50 11.977
		C547_Crenicichla_jurubi_Canoas					MW563541	MW554886	Upper Uruguai drainage, Rio Caveiras, tributary of Rio Canoas, S27 51.820, W50 11.977
Crenicichla empheres Lucena, 2007 (valid)	empheres	C539_Crenicichla_empheres_Chapeco	1	1	1	1	MW563534	MW554879	Upper Uruguai drainage, Rio Chapeco, S26 42.564, W51 53.490
		C535_Crenicichla_empheres_Chapeco					MW563530		Upper Uruguai drainage, Rio Chapeco, S26 42.564, W51 53.490
		C536_Crenicichla_empheres_Chapeco					MW563531		Upper Uruguai drainage, Rio Chapeco, S26 42.564, W51 53.490
		C540_Crenicichla_empheres_Chapeco					MW563535	MW554880	Upper Uruguai drainage, Rio Chapeco, S26 42.564, W51 53.490
		C537_Crenicichla_empheres_Chapeco					MW563532	MW554877	Upper Uruguai drainage, Rio Chapeco, S26 42.564, W51 53.490
		C538_Crenicichla_empheres_Chapeco					MW563533	MW554878	Upper Uruguai drainage, Rio Chapeco, S26 42.564, W51 53.490
Crenicichla tendybaguassu Lucena & Kullander, 1992 (valid)	tendybaguassu	C124_Crenicichla_tendybaguassu_Jacutinga	2	6	4	2	JF520097.1	JF519963.1	Piálek et al., 2012
Crenicichla minuano Lucena & Kullander, 1992 (valid)	minuano	C118_Crenicichla_minuano_Forquilha					JF520058.1	JF519924.1	Piálek et al., 2012
Crenicichla igara Lucena & Kullander, 1992 (valid)	igara	C542_Crenicichla_igara_Peixes					MW563536	MW554881	Upper Uruguay drainage, Rio do Peixe, S26 44.833, W51 01.671
Crenicichla missioneira Lucena & Kullander, 1992 (valid)	missioneira	C291_Crenicichla_missioneira_Toro					MW563442	MW554781	Rio Uruguay basin, Arroyo Toro close to mouth into Arroyo Pepirí-Guazú, 26°36'32.81"S, 53°44'13.97"W
	missioneira	C284_Crenicichla_missioneira_Toro						MW554774	Rio Uruguay basin, Arroyo Toro close to mouth into Arroyo Pepirí-Guazú, 26°36'32.81"S, 53°44'13.97"W
	missioneira	C296_Crenicichla_missioneira_Toro						MW554786	Rio Uruguay basin, Arroyo Toro close to mouth into Arroyo Pepirí-Guazú, 26°36'32.81"S, 53°44'13.97"W
	missioneira	C281_Crenicichla_missioneira_biglips_Toro					MW563439	MW554771	Rio Uruguay basin, Arroyo Toro close to mouth into Arroyo Pepirí-Guazú, 26°36'32.81"S, 53°44'13.97"W
	missioneira	C286_Crenicichla_missioneira_biglips_Toro						MW554776	Rio Uruguay basin, Arroyo Toro close to mouth into Arroyo Pepirí-Guazú, 26°36'32.81"S, 53°44'13.97"W
	minuano	C283_Crenicichla_minuano_Toro						MW554773	Rio Uruguay basin, Arroyo Toro close to mouth into Arroyo Pepirí-Guazú, 26°36'32.81"S, 53°44'13.97"W
	minuano	C295_Crenicichla_minuano_red_Toro						MW554785	Rio Uruguay basin, Arroyo Toro close to mouth into Arroyo Pepirí-Guazú, 26°36'32.81"S, 53°44'13.97"W
	minuano	C279_Crenicichla_minuano_Toro					MW563437	MW554769	Rio Uruguay basin, Arroyo Toro close to mouth into Arroyo Pepirí-Guazú, 26°36'32.81"S, 53°44'13.97"W
	minuano	C280_Crenicichla_minuano_Toro					MW563438	MW554770	Rio Uruguay basin, Arroyo Toro close to mouth into Arroyo Pepirí-Guazú, 26°36'32.81"S, 53°44'13.97"W
	missioneira	C285_Crenicichla_missioneira_biglips_Toro						MW554775	Rio Uruguay basin, Arroyo Toro close to mouth into Arroyo Pepirí-Guazú, 26°36'32.81"S, 53°44'13.97"W
	minuano	C289_Crenicichla_minuano_Toro						MW554779	Rio Uruguay basin, Arroyo Toro close to mouth into Arroyo Pepirí-Guazú, 26°36'32.81"S, 53°44'13.97"W
	minuano	C288_Crenicichla_minuano_Toro						MW554778	Rio Uruguay basin, Arroyo Toro close to mouth into Arroyo Pepirí-Guazú, 26°36'32.81"S, 53°44'13.97"W
	missioneira	C282_Crenicichla_missioneira_biglips_Toro					MW563440	MW554772	Rio Uruguay basin, Arroyo Toro close to mouth into Arroyo Pepirí-Guazú, 26°36'32.81"S, 53°44'13.97"W
	minuano	C293_Crenicichla_minuano_red_Toro						MW554783	Rio Uruguay basin, Arroyo Toro close to mouth into Arroyo Pepirí-Guazú, 26°36'32.81"S, 53°44'13.97"W
	missioneira	C362_Crenicichla_missioneira_Yaboti						MW554852	Rio Uruguay basin, lower Arroyo Yaboti Guazú at bridge to Salto Moconá, 27° 8'41.72"S, 53°54'28.51"W
	minuano	C125_Crenicichla_minuano_Jacutinga					MW563361	MW554730	Rio Uruguay basin, Rio Jacuntinga, S 27 10 32.7, W 52 09 57.5
	missioneira	C287_Crenicichla_missioneira_biglips_Toro						MW554777	Rio Uruguay basin, Arroyo Toro close to mouth into Arroyo Pepirí-Guazú, 26°36'32.81"S, 53°44'13.97"W
	missioneira	C328_Crenicichla_missioneira_Soberbio						MW554818	Rio Uruguay basin, lower Arroyo Soberbio at camping, 27°15'39.64"S, 54°13'22.65"W
	missioneira	C337_Crenicichla_missioneira_short_jaws_Soberbio						MW554827	Rio Uruguay basin, lower Arroyo Soberbio at camping, 27°15'39.64"S, 54°13'22.65"W
	missioneira	C358_Crenicichla_missioneira_male_Yaboti					MW563467	MW554848	Rio Uruguay basin, lower Arroyo Yaboti Guazú at bridge to Salto Moconá, 27° 8'41.72"S, 53°54'28.51"W
	missioneira	C132_Crenicichla_missioneira_Chapeco					MW563363	MW554732	Rio Uruguay basin, unnamed small tributary just at mouth into Rio Chapeco, S 26 50 20.1, W 52 44 45.3
	missioneira	C348_Crenicichla_missioneira_male_big						MW554838	Rio Uruguay basin, lower Arroyo Yaboti Guazú at bridge to Salto Moconá, 27° 8'41.72"S, 53°54'28.51"W
	missioneira	C359_Crenicichla_missioneira_male_Yaboti						MW554849	Rio Uruguay basin, lower Arroyo Yaboti Guazú at bridge to Salto Moconá, 27° 8'41.72"S, 53°54'28.51"W
	tendybaguassu	C179_Crenicichla_tendybaguassu_Misiones					JF520098.1	JF519964.1	Piálek et al., 2012
	tendybaguassu	C123_Crenicichla_tendybaguassu_Jacutinga					JF520096.1	JF519962.1	Piálek et al., 2013
	missioneira	C131_Crenicichla_missioneira_Chapeco					JF520067.1	JF519933.1	Piálek et al., 2014
	missioneira	C147_Crenicichla_missioneira_Chapeco					JF520068.1	JF519934.1	Piálek et al., 2015
	minuano	C175_Crenicichla_cf_minuano					MW563365	MW554733	Rio Uruguay basin, lower Arroyo Soberbio at camping, 27°15'39.64"S, 54°13'22.65"W
	minuano	C325_Crenicichla_minuano_Soberbio					MW563459	MW554815	Rio Uruguay basin, lower Arroyo Soberbio at camping, 27°15'39.64"S, 54°13'22.65"W
	minuano	C329_Crenicichla_minuano_Soberbio					MW563461	MW554819	Rio Uruguay basin, lower Arroyo Soberbio at camping, 27°15'39.64"S, 54°13'22.65"W
	missioneira	C331_Crenicichla_missioneira_short_jaws_Soberbio						MW554821	Rio Uruguay basin, lower Arroyo Soberbio at camping, 27°15'39.64"S, 54°13'22.65"W
	missioneira	C200_Crenicichla_cf_missioneira						MW554742	Rio Uruguay basin, lower Arroyo Yaboti Guazú at bridge to Salto Moconá, 27° 8'41.72"S, 53°54'28.51"W
	missioneira	C349_Crenicichla_missioneira_short_jaws_Yaboti						MW554839	Rio Uruguay basin, lower Arroyo Yaboti Guazú at bridge to Salto Moconá, 27° 8'41.72"S, 53°54'28.51"W
	missioneira	C353_Crenicichla_missioneira_short_jaws_Yaboti						MW554843	Rio Uruguay basin, lower Arroyo Yaboti Guazú at bridge to Salto Moconá, 27° 8'41.72"S, 53°54'28.51"W
	minuano	C102_Crenicichla_minuano_Itacaruare					JF520061.1	JF519927.1	Piálek et al., 2012
	missioneira	C334_Crenicichla_missioneira_short_jaws_Soberbio						MW554824	Rio Uruguay basin, lower Arroyo Soberbio at camping, 27°15'39.64"S, 54°13'22.65"W
	minuano	C339_Crenicichla_minuano_female_D_blackspot_Soberbio						MW554829	Rio Uruguay basin, lower Arroyo Soberbio at camping, 27°15'39.64"S, 54°13'22.65"W
Crenicichla hadrostigma Lucena, 2007 (valid)	hadrostigma	C350_Crenicichla_hadrostigma_female_Yaboti					MW563465	MW554840	Rio Uruguay basin, lower Arroyo Yaboti Guazú at bridge to Salto Moconá, 27° 8'41.72"S, 53°54'28.51"W
	minuano	C345_Crenicichla_minuano_female_Yaboti					MW563463	MW554835	Rio Uruguay basin, lower Arroyo Yaboti Guazú at bridge to Salto Moconá, 27° 8'41.72"S, 53°54'28.51"W
	tendybaguassu	C327_Crenicichla_tendybaguassu_Soberbio						MW554817	Rio Uruguay basin, lower Arroyo Soberbio at camping, 27°15'39.64"S, 54°13'22.65"W
	tendybaguassu	C330_Crenicichla_tendybaguassu_Soberbio						MW554820	Rio Uruguay basin, lower Arroyo Soberbio at camping, 27°15'39.64"S, 54°13'22.65"W
	tendybaguassu	C341_Crenicichla_tendybaguassu_Soberbio						MW554831	Rio Uruguay basin, lower Arroyo Soberbio at camping, 27°15'39.64"S, 54°13'22.65"W
	tendybaguassu	C338_Crenicichla_tendybaguassu_male_Soberbio						MW554828	Rio Uruguay basin, lower Arroyo Soberbio at camping, 27°15'39.64"S, 54°13'22.65"W
	tendybaguassu	C326_Crenicichla_tendybaguassu_Soberbio					MW563460	MW554816	Rio Uruguay basin, lower Arroyo Soberbio at camping, 27°15'39.64"S, 54°13'22.65"W
	missioneira	C99_Crenicichla_missioneira_Itacaruare					MW563359	MW554728	Rio Uruguay basin, Rio Itacaruare at camp, S 27 52 33.8, W 55 16 35.1
	minuano	C100_Crenicichla_minuano_Itacaruare					JF520060.1	JF519926.1	Piálek et al., 2012
	missioneira	C301_Crenicichla_missioneira_biglips_Yaboti_Mini					MW563446	MW554791	Rio Uruguay basin, upper Arroyo Yaboti-Miní, 26°43'19.91"S, 53°50'36.19"W
	tendybaguassu	C311_Crenicichla_tendybaguassu_Fortaleza					MW563453	MW554801	Rio Uruguay basin, Arroyo Fortaleza, 26°45'56.6" S, 54°10'57.4" W
	missioneira	C300_Crenicichla_missioneira_Yaboti_Mini						MW554790	Rio Uruguay basin, upper Arroyo Yaboti-Miní, 26°43'19.91"S, 53°50'36.19"W
	missioneira	C298_Crenicichla_missioneira_Yaboti_Mini					MW563445	MW554788	Rio Uruguay basin, upper Arroyo Yaboti-Miní, 26°43'19.91"S, 53°50'36.19"W
	minuano	C306_Crenicichla_minuano_Yaboti_Mini					MW563449	MW554796	Rio Uruguay basin, upper Arroyo Yaboti-Miní, 26°43'19.91"S, 53°50'36.19"W
	minuano	C360_Crenicichla_minuano_small_Yaboti						MW554850	Rio Uruguay basin, lower Arroyo Yaboti Guazú at bridge to Salto Moconá, 27° 8'41.72"S, 53°54'28.51"W
	minuano	C361_Crenicichla_minuano_small_Yaboti						MW554851	Rio Uruguay basin, lower Arroyo Yaboti Guazú at bridge to Salto Moconá, 27° 8'41.72"S, 53°54'28.51"W
	minuano	C322_Crenicichla_minuano_Fortaleza						MW554812	Rio Uruguay basin, Arroyo Fortaleza, 26°45'56.6" S, 54°10'57.4" W
	minuano	C312_Crenicichla_minuano_Fortaleza					MW563454	MW554802	Rio Uruguay basin, Arroyo Fortaleza, 26°45'56.6" S, 54°10'57.4" W
	hadrostigma	C197_Crenicichla_cf_hadrostigma					JF520005.1	JF519871.1	Piálek et al., 2012
	minuano	C290_Crenicichla_minuano_red_Toro					MW563441	MW554780	Rio Uruguay basin, Arroyo Toro close to mouth into Arroyo Pepirí-Guazú, 26°36'32.81"S, 53°44'13.97"W
Crenicichla celidochilus Casciotta, 1987 (valid)	celidochilus	C128_Crenicichla_celidochilus_Jacutinga					JF519994.1	JF519860.1	Piálek et al., 2012
	celidochilus	C126_Crenicichla_celidochilus_Jacutinga					JF519993.1	JF519859.1	Piálek et al., 2012
	minuano	C180_Crenicichla_Misiones_black_line					MW563366	MW554734	Rio Uruguay basin, lower Arroyo Yaboti Guazú at bridge to Salto Moconá, 27° 8'41.72"S, 53°54'28.51"W
	minuano	C28_Crenicichla_minuano_Paraiso_Yaboti					JF520064.1	JF519930.1	Piálek et al., 2012
	missioneira	C97_Crenicichla_missioneira_Itacaruare					MW563358	MW554727	Rio Uruguay basin, Rio Itacaruare at camp, S 27 52 33.8, W 55 16 35.1
	missioneira	C343_Crenicichla_missioneira_female_short_jaws_Soberbio						MW554833	Rio Uruguay basin, lower Arroyo Soberbio at camping, 27°15'39.64"S, 54°13'22.65"W
	minuano	C333_Crenicichla_minuano_Soberbio						MW554823	Rio Uruguay basin, lower Arroyo Soberbio at camping, 27°15'39.64"S, 54°13'22.65"W
	missioneira	DNA1_Crenicichla_missioneira					MW563657		Rio Uruguay basin, lower Arroyo Yaboti Guazú at bridge to Salto Moconá, 27° 8'41.72"S, 53°54'28.51"W
	hadrostigma	C354_Crenicichla_hadrostigma_male_Yaboti						MW554844	Rio Uruguay basin, lower Arroyo Yaboti Guazú at bridge to Salto Moconá, 27° 8'41.72"S, 53°54'28.51"W
	missioneira	C342_Crenicichla_missioneira_male_short_jaws_Soberbio						MW554832	Rio Uruguay basin, lower Arroyo Soberbio at camping, 27°15'39.64"S, 54°13'22.65"W
	missioneira	C33_Crenicichla_missioneira_Shangai					JF520077.1	JF519943.1	Piálek et al., 2012
	missioneira	C30_Crenicichla_missioneira_Shangai					JF520076.1	JF519942.1	Piálek et al., 2012
	hadrostigma	C356_Crenicichla_hadrostigma_female_Yaboti						MW554846	Rio Uruguay basin, lower Arroyo Yaboti Guazú at bridge to Salto Moconá, 27° 8'41.72"S, 53°54'28.51"W
	missioneira	C336_Crenicichla_missioneira_female_Soberbio						MW554826	Rio Uruguay basin, lower Arroyo Soberbio at camping, 27°15'39.64"S, 54°13'22.65"W
	missioneira	C323_Crenicichla_missioneira_Soberbio					MW563457	MW554813	Rio Uruguay basin, lower Arroyo Soberbio at camping, 27°15'39.64"S, 54°13'22.65"W
	hadrostigma	C355_Crenicichla_hadrostigma_male_Yaboti						MW554845	Rio Uruguay basin, lower Arroyo Yaboti Guazú at bridge to Salto Moconá, 27° 8'41.72"S, 53°54'28.51"W
	missioneira	C324_Crenicichla_missioneira_Soberbio					MW563458	MW554814	Rio Uruguay basin, lower Arroyo Soberbio at camping, 27°15'39.64"S, 54°13'22.65"W
	missioneira	C98_Crenicichla_missioneira_Itacaruare					JF520074.1	JF519940.1	Piálek et al., 2012
	minuano	C332_Crenicichla_minuano_Soberbio						MW554822	Rio Uruguay basin, lower Arroyo Soberbio at camping, 27°15'39.64"S, 54°13'22.65"W
	hadrostigma	C145_Crenicichla_hadrostigma_Misiones					JF520004.1	JF519870.1	Piálek et al., 2012
	minuano	C335_Crenicichla_minuano_Soberbio						MW554825	Rio Uruguay basin, lower Arroyo Soberbio at camping, 27°15'39.64"S, 54°13'22.65"W
	minuano	C346_Crenicichla_minuano_female_Yaboti						MW554836	Rio Uruguay basin, lower Arroyo Yaboti Guazú at bridge to Salto Moconá, 27° 8'41.72"S, 53°54'28.51"W
	minuano	C121_Crenicichla_minuano_Jacutinga					MW563360	MW554729	Rio Uruguay basin, Rio Jacuntinga, S 27 10 32.7, W 52 09 57.5
	minuano	C120_Crenicichla_minuano_Jacutinga					JF520062.1	JF519928.1	Piálek et al., 2012
	minuano	C127_Crenicichla_minuano_Jacutinga					MW563362	MW554731	Rio Uruguay basin, Rio Jacuntinga, S 27 10 32.7, W 52 09 57.5
	minuano	C216_Crenicichla_Misiones_black_line					MW563388	MW554751	Rio Uruguay basin, Rio Jacuntinga, S 27 10 32.7, W 52 09 57.5
	minuano	C130_Crenicichla_minuano_Ariranha					JF520057.1	JF519923.1	Piálek et al., 2012
	minuano	C659_Crenicichla_sp_Blackline					MW563635		Rio Uruguay basin, Rio Ariranha, S 27 06 51.7, W 52 24 07.0
	missioneira	C129_Crenicichla_missioneira_Ariranha					JF520066.1	JF519932.1	Piálek et al., 2012
	hadrostigma	C344_Crenicichla_hadrostigma_male_Yaboti					MW563462	MW554834	Rio Uruguay basin, lower Arroyo Yaboti Guazú at bridge to Salto Moconá, 27° 8'41.72"S, 53°54'28.51"W
	minuano	C122_Crenicichla_minuano_Jacutinga					JF520063.1	JF519929.1	Piálek et al., 2012
	missioneira	C351_Crenicichla_missioneira_short_jaws_Yaboti						MW554841	Rio Uruguay basin, lower Arroyo Yaboti Guazú at bridge to Salto Moconá, 27° 8'41.72"S, 53°54'28.51"W
	minuano	C80_Crenicichla_minuano_Paraiso_Yaboti					JF520065.1	JF519931.1	Piálek et al., 2012
	minuano	C303_Crenicichla_minuano_new_Yaboti_Mini					MW563448	MW554793	Rio Uruguay basin, upper Arroyo Yaboti-Miní, 26°43'19.91"S, 53°50'36.19"W
	missioneira	C297_Crenicichla_missioneira_Yaboti_Mini					MW563444	MW554787	Rio Uruguay basin, upper Arroyo Yaboti-Miní, 26°43'19.91"S, 53°50'36.19"W
	minuano	C347_Crenicichla_minuano_male_long_body_Yaboti					MW563464	MW554837	Rio Uruguay basin, lower Arroyo Yaboti Guazú at bridge to Salto Moconá, 27° 8'41.72"S, 53°54'28.51"W
	missioneira	C299_Crenicichla_missioneira_Yaboti_Mini						MW554789	Rio Uruguay basin, upper Arroyo Yaboti-Miní, 26°43'19.91"S, 53°50'36.19"W
	missioneira	C36_Crenicichla_missioneira_Guerrero					JF520072.1	JF519938.1	Piálek et al., 2012
	missioneira	C39_Crenicichla_missioneira_Guerrero					JF520073.1	JF519939.1	Piálek et al., 2012
	missioneira	C294_Crenicichla_missioneira_Toro						MW554784	Rio Uruguay basin, Arroyo Toro close to mouth into Arroyo Pepirí-Guazú, 26°36'32.81"S, 53°44'13.97"W
	missioneira	C357_Crenicichla_missioneira_male_Yaboti					MW563466	MW554847	Rio Uruguay basin, lower Arroyo Yaboti Guazú at bridge to Salto Moconá, 27° 8'41.72"S, 53°54'28.51"W
	missioneira	C340_Crenicichla_missioneira_female_Soberbio						MW554830	Rio Uruguay basin, lower Arroyo Soberbio at camping, 27°15'39.64"S, 54°13'22.65"W
	missioneira	C292_Crenicichla_cf_missioneira_Toro					MW563443	MW554782	Rio Uruguay basin, Arroyo Toro close to mouth into Arroyo Pepirí-Guazú, 26°36'32.81"S, 53°44'13.97"W
	minuano	C181_Crenicichla_cf_minuano					MW563367	MW554735	Rio Uruguay basin, lower Arroyo Yaboti Guazú at bridge to Salto Moconá, 27° 8'41.72"S, 53°54'28.51"W
	minuano	C352_Crenicichla_minuano_male_Yaboti						MW554842	Rio Uruguay basin, lower Arroyo Yaboti Guazú at bridge to Salto Moconá, 27° 8'41.72"S, 53°54'28.51"W
	minuano	C309_Crenicichla_minuano_new_male_Fortaleza						MW554799	Rio Uruguay basin, Arroyo Fortaleza, 26°45'56.6" S, 54°10'57.4" W
	minuano	C316_Crenicichla_minuano_new_Fortaleza						MW554806	Rio Uruguay basin, Arroyo Fortaleza, 26°45'56.6" S, 54°10'57.4" W
	minuano	C308_Crenicichla_minuano_new_male_Fortaleza					MW563451	MW554798	Rio Uruguay basin, Arroyo Fortaleza, 26°45'56.6" S, 54°10'57.4" W
	minuano	C21_Crenicichla_minuano_new_Fortaleza					MW563334	MW554715	Rio Uruguay basin, Arroyo Fortaleza, 26°45'56.6" S, 54°10'57.4" W
	minuano	C314_Crenicichla_minuano_new_male_Fortaleza					MW563456	MW554804	Rio Uruguay basin, Arroyo Fortaleza, 26°45'56.6" S, 54°10'57.4" W
	minuano	C307_Crenicichla_minuano_new_female_Fortaleza					MW563450	MW554797	Rio Uruguay basin, Arroyo Fortaleza, 26°45'56.6" S, 54°10'57.4" W
	minuano	C319_Crenicichla_minuano_new_Fortaleza						MW554809	Rio Uruguay basin, Arroyo Fortaleza, 26°45'56.6" S, 54°10'57.4" W
	minuano	C302_Crenicichla_minuano_new_Yaboti_Mini					MW563447	MW554792	Rio Uruguay basin, upper Arroyo Yaboti-Miní, 26°43'19.91"S, 53°50'36.19"W
	minuano	C304_Crenicichla_minuano_new_Yaboti_Mini						MW554794	Rio Uruguay basin, upper Arroyo Yaboti-Miní, 26°43'19.91"S, 53°50'36.19"W
	minuano	C83_Crenicichla_minuano_new_Fortaleza					JF520059.1	JF519925.1	Piálek et al., 2012
	minuano	C318_Crenicichla_minuano_new_Fortaleza						MW554808	Rio Uruguay basin, Arroyo Fortaleza, 26°45'56.6" S, 54°10'57.4" W
	minuano	C23_Crenicichla_minuano_new_Fortaleza					MW563336	MW554717	Rio Uruguay basin, Arroyo Fortaleza, 26°45'56.6" S, 54°10'57.4" W
	minuano	C305_Crenicichla_minuano_new_Yaboti_Mini						MW554795	Rio Uruguay basin, upper Arroyo Yaboti-Miní, 26°43'19.91"S, 53°50'36.19"W
Crenicichla tingui Kullander & Lucena, 2006 (valid)	tingui	C556_Crenicichla_tingui_Cubatao	1	0	0	0	MW563550		Rio Cubatao drainage, Rio Cubatao, S25 49.784, W48 47.469
		C557_Crenicichla_tingui_Cubatao					MW563551		Rio Cubatao drainage, Rio Cubatao, S25 49.784, W48 47.469
Crenicichla iguapina Kullander & Lucena, 2006 (valid)	iguapina	C559_Crenicichla_iguapina_Ribeira_do_Iguape		1	1	1	MW563553		Rio Ribeira do Iguape drainage, tributary of Rio Jacupiranga, S24 37.929, W47 50.981
		C558_Crenicichla_iguapina_Ribeira_do_Iguape					MW563552		Rio Ribeira do Iguape drainage, tributary of Rio Jacupiranga, S24 37.929, W47 50.981
Crenicichla lacustris (Castelnau, 1855) (valid)	lacustris	DNA3_Crenicichla_lacustris_Contas	1	1	1	1	JF520018.1	JF519884.1	Piálek et al., 2012
		C176_Crenicichla_lacustris					JF520017.1	JF519883.1	Piálek et al., 2012
Crenicichla cf. dorsocellata	cf. dorsocellata	C474_Crenicichla_cf_dorsocellata_Campos	1	1	1	1	MW563482		Piálek et al., 2012
		C621_Crenicichla_cf_lacustris					MW563602		Piálek et al., 2012
Crenicichla dorsocellata (Haseman, 1911) (synonym)	dorsocellata	C201_Crenicichla_lacustris_dorsocellata	1	1	1	1	JF520021.1	JF519887.1	Piálek et al., 2012
		II74_Crenicichla_lacustris_dorsocellata					JF520020.1	JF519886.1	Piálek et al., 2012
Crenicichla biocellata (von Ihering, 1914) (synonym)	biocellata (sp. Itapemirim)	C604_Crenicichla_biocellata_Itapemirim	1	1	2	1	MW554712		Rio Itapemirm, 20.9S, 41.0W
		C234_Crenicichla_lacustris_biocellata_Espirito_Santo					JF520019.1	JF519885.1	Piálek et al., 2012
		C603_Crenicichla_biocellata_Itapemirim					MW563588		Rio Itapemirm, 20.9S, 41.0W
Crenicichla punctata Hensel, 1870 (valid)	punctata	DNA9_Crenicichla_punctata	1	1	1	1	JF520090.1	JF519956.1	Piálek et al., 2012
Crenicichla lucenai Mattos et al., 2014 (valid)	lucenai	C553_Crenicichla_lucenai_Das_Antas	1	1	1	1	MW563547		Rio Jacui drainage, Rio Camisas, tributary of Rio das Antas, S28 50.795, W50 18.160
		C552_Crenicichla_lucenai_Das_Antas					MW563546		Rio Jacui drainage, Rio Camisas, tributary of Rio das Antas, S28 50.795, W50 18.160
Crenicichla maculata Kullander & Lucena, 2006 (valid)	maculata	C555_Crenicichla_maculata_Tres_Forquilhas	1	1	1	1	MW563549		Lagoa Itapeva drainage, Rio Tres Forquilhas, S29 23.421, W50 11.040
		C554_Crenicichla_maculata_Tres_Forquilhas					MW563548		Lagoa Itapeva drainage, Rio Tres Forquilhas, S29 23.421, W50 11.040
Crenicichla scottii (Eingenmann, 1907) (valid)	scottii	C146_Crenicichla_scottii_Entre_Rios	1	0	1	0	JF520094.1	JF519960.1	Piálek et al., 2012
Crenicichla gaucho Lucena & Kullander, 1992 (valid)	gaucho	C101_Crenicichla_gaucho_Itacaruare		2	2	2	JF520002.1	JF519868.1	Piálek et al., 2012
		C204_Crenicichla_gaucho	1				MW563382	MW554745	Rio Uruguay basin, Rio Itacaruare at camp, S 27 52 33.8, W 55 16 35.1
		DNA4_Crenicichla_gaucho					MW563658		Rio Uruguay basin, Rio Itacaruare at camp, S 27 52 33.8, W 55 16 35.1
		C96_Crenicichla_gaucho_Itacaruare					JF520001.1	JF519867.1	Piálek et al., 2012
		C87_Crenicichla_gaucho_Shangai					MW563355		Rio Uruguay basin, Arroyo Schangai, 27°28'13.8" S, 54°41'24.5" W
		C32_Crenicichla_gaucho_Shangai					GQ377512.1	GQ377505.1	Casciotta et al., 2010
		C31_Crenicichla_gaucho_Shangai					JF519999.1	JF519865.1	Piálek et al., 2012
		C38_Crenicichla_gaucho_Guerrero					GQ377513.1	GQ377506.1	Casciotta et al., 2010
		C37_Crenicichla_gaucho_Guerrero					JF520000.1	JF519866.1	Piálek et al., 2012
		C24_Crenicichla_gaucho_Fortaleza					JF519997.1	JF519863.1	Piálek et al., 2012
		C25_Crenicichla_gaucho_Fortaleza					MW563337	MW554718	Rio Uruguay basin, Arroyo Fortaleza, 26°45'56.6" S, 54°10'57.4" W
		C26_Crenicichla_gaucho_Paraiso_Yaboti					JF519998.1	JF519864.1	Piálek et al., 2012
		C79_Crenicichla_gaucho_Paraiso_Yaboti					MW563351		Rio Uruguay basin, small affluent of Arroyo Paraiso below Salto Yerbas, 27°14'15.1" S, 54°02'38.5" W
		C27_Crenicichla_gaucho_Paraiso_Yaboti					MW563338	MW554719	Rio Uruguay basin, small affluent of Arroyo Paraiso above Salto Yerbas, 27°14'15.1" S, 54°02'38.5" W
Crenicichla jaguarensis Haseman, 1911 (valid)	jaguarensis	C568_Crenicichla_jaguarensis	1	1	1	1	MW563560		Rio Paraná basin, Rio Mogi Guaçu at confluence with Rio Jaguari-Mirim, 21.9814722S, 47.2937942W
Crenicichla jupiaensis Britski & Luengo, 1968 (valid)	jupiaensis	J9_Crenicichla_jupiaensis_Posadas	1	1	1	1	JF520016.1	JF519882.1	Piálek et al., 2012
Crenicichla vittata Heckel, 1840 (valid)	vittata	C62_Crenicichla_vittata_Ibera	1	1	1	1	JF520111.1	JF519977.1	Piálek et al., 2012
		C694_Crenicichla_vittata_Pantanal					MW563654		Rio Paraguay basin, Rio Abobral, Pantanal, 19°25'57.67"S, 57° 3'10.41"W
		C221_Crenicichla_vittata_Asuncion					JF520112.1	JF519978.1	Piálek et al., 2012
		III4_Crenicichla_vittata_Asuncion					JF520113.1	JF519979.1	Piálek et al., 2012
		III5_Crenicichla_vittata_Asuncion					JF520114.1	JF519980.1	Piálek et al., 2012
Crenicichla ypo Casciotta et al., 2010 (valid)	ypo	C163_Crenicichla_ypo	1	1	1	1	JF520122.1	JF519988.1	Piálek et al., 2012
		C9_Crenicichla_ypo					JF520119.1	JF519985.1	Piálek et al., 2012
		C173_Crenicichla_ypo					JF520123.1	JF519989.1	Piálek et al., 2012
		C417_Crenicichla_ypo_female					KY356746.1	KY356632.1	Piálek et al., 2019a,b
		C416_Crenicichla_ypo					KY356743.1	KY356630.1	Piálek et al., 2019a,b
		C418_Crenicichla_ypo					KY356744.1	KY356631.1	Piálek et al., 2019a,b
		C8_Crenicichla_ypo					KY356742.1	GQ377503.1	Piálek et al., 2019a,b; Casciotta et al., 2010
		C162_Crenicichla_ypo					JF520121.1	JF519987.1	Piálek et al., 2012
		C697_Crenicichla_ypo					KY356745.1		Piálek et al., 2019a,b
		C153_Crenicichla_ypo					JF520120.1	JF519986.1	Piálek et al., 2012
Crenicichla sp. Jordao	sp. Jordao	C530_Crenicichla_cf_iguassuensis_Jordao	1	1	1	1	MW563525	MW554872	Iguazu basin, Rio Pinhão, tributary of Rio Jordão, S25 35.922, W51 40.752
		C531_Crenicichla_cf_iguassuensis_Jordao					MW563526	MW554873	Iguazu basin, Rio Pinhão, tributary of Rio Jordão, S25 35.922, W51 40.752
		C529_Crenicichla_cf_iguassuensis_Jordao					MW563524	MW554871	Iguazu basin, Rio Pinhão, tributary of Rio Jordão, S25 35.922, W51 40.752
		C534_Crenicichla_cf_iguassuensis_Jordao					MW563529	MW554876	Iguazu basin, Rio Pinhão, tributary of Rio Jordão, S25 35.922, W51 40.752
		C533_Crenicichla_cf_iguassuensis_Jordao					MW563528	MW554875	Iguazu basin, Rio Pinhão, tributary of Rio Jordão, S25 35.922, W51 40.752
		C532_Crenicichla_cf_iguassuensis_Jordao					MW563527	MW554874	Iguazu basin, Rio Pinhão, tributary of Rio Jordão, S25 35.922, W51 40.752
Crenicichla hu Pialek et al., 2010 (valid)	hu	C13_Crenicichla_hu_Piray_Mini	2	2	2	2	JF520006.1	JF519872.1	Piálek et al., 2012
		C14_Crenicichla_hu_Piray_Mini					JF520007.1	JF519873.1	Piálek et al., 2012
		C440_Crenicichla_hu_Piray_Mini_low					KY356636.1	KY356543.1	Piálek et al., 2019a,b
		C442_Crenicichla_hu_Piray_Mini_low					KY356637.1	KY356544.1	Piálek et al., 2019a,b
		C447_Crenicichla_hu_Piray_Mini_low					KY356640.1	KY356547.1	Piálek et al., 2019a,b
		C110_Crenicichla_hu_affluent_Piray_Mini					JF520008.1	JF519874.1	Piálek et al., 2012
		C443_Crenicichla_hu_Piray_Mini_low					KY356638.1	KY356545.1	Piálek et al., 2019a,b
		C444_Crenicichla_hu_Piray_Mini_low					KY356639.1	KY356546.1	Piálek et al., 2019a,b
		C112_Crenicichla_hu_affluent_Piray_Mini					KY356633.1		Piálek et al., 2019a,b
		C448_Crenicichla_hu_female_Piray_Mini_low					KY356634.1	KY356541.1	Piálek et al., 2019a,b
		C111_Crenicichla_hu_affluent_Piray_Mini					JF520009.1	JF519875.1	Piálek et al., 2012
		C439_Crenicichla_hu_Piray_Mini_low					KY356635.1	KY356542.1	Piálek et al., 2019a,b
Crenicichla sp. Piray Guazu	sp. Piray Guazu	C424_Crenicichla_sp_Piray_Guazu_female	1	1	1	1	KY356685.1	KY356576.1	Piálek et al., 2019a,b
		C422_Crenicichla_sp_Piray_Guazu					KY356679.1	KY356578.1	Piálek et al., 2019a,b
		C425_Crenicichla_sp_Piray_Guazu					KY356681.1	KY356580.1	Piálek et al., 2019a,b
		C682_Crenicichla_sp_Piray_Guazu_Yellow					MW563647		Rio Paraná basin, Rio Piray-Guazú, 26°26'33.93"S, 54° 8'30.04"W
		C423_Crenicichla_sp_Piray_Guazu					KY356680.1	KY356579.1	Piálek et al., 2019a,b
		C17_Crenicichla_sp_Piray_Guazu					JF520081.1	JF519947.1	Piálek et al., 2012
		C419_Crenicichla_sp_Piray_Guazu_cf_line_female					KY356684.1	KY356583.1	Piálek et al., 2019a,b
		C421_Crenicichla_sp_Piray_Guazu					KY356678.1	KY356577.1	Piálek et al., 2019a,b
		C683_Crenicichla_sp_Piray_Guazu_Grey					KY356687.1		Piálek et al., 2019a,b
		C177_Crenicichla_sp_Piray_Guazu					JF520082.1	JF519948.1	Piálek et al., 2012
		C428_Crenicichla_sp_Piray_Guazu					KY356683.1	KY356582.1	Piálek et al., 2019a,b
		C427_Crenicichla_sp_Piray_Guazu					KY356682.1	KY356581.1	Piálek et al., 2019a,b
		C215_Crenicichla_sp_Piray_Guazu					JF520083.1	JF519949.1	Piálek et al., 2012
		C15_Crenicichla_sp_Piray_Guazu					JF520080.1	JF519946.1	Piálek et al., 2012
		C470_Crenicichla_sp_Piray_Guazu_female						KY356584.1	Rio Paraná basin, Rio Piray-Guazú, 26°26'33.93"S, 54° 8'30.04"W
		C81_Crenicichla_sp_Piray_Guazu					KY356686.1		Piálek et al., 2019a,b
Crenicichla tapii Piálek et al., 2015 (valid)	tapii	C409_Crenicichla_tapii_headspots_San_Antonio	1	1	1	1	MW563470	MW554855	Iguazú basin, Rio San Antonio, 25°59'0.54"S, 53°49'9.56"W
		C411_Crenicichla_tapii_headspots_San_Antonio					MW563471	MW554856	Iguazú basin, Rio San Antonio, 25°59'0.54"S, 53°49'9.56"W
		C412_Crenicichla_tapii_headspots_San_Antonio					MW563472	MW554857	Iguazú basin, Rio San Antonio, 25°59'0.54"S, 53°49'9.56"W
		C458_Crenicichla_tapii_smallmouth_Deseado					MW563480	MW554865	Iguazú basin, Arroyo Deseado at Deseado camp, tributary of Rio San Antonio, 25°40'11.67"S, 53°55'59.50"W
		C455_Crenicichla_tapii_smallmouth_Deseado					MW563479	MW554864	Iguazú basin, Arroyo Deseado at Deseado camp, tributary of Rio San Antonio, 25°40'11.67"S, 53°55'59.50"W
		C453_Crenicichla_tapii_smallmouth_Deseado					MW563477	MW554862	Iguazú basin, Arroyo Deseado at Deseado camp, tributary of Rio San Antonio, 25°40'11.67"S, 53°55'59.50"W
		C459_Crenicichla_tapii_Deseado						MW554866	Iguazú basin, Arroyo Deseado at Deseado camp, tributary of Rio San Antonio, 25°40'11.67"S, 53°55'59.50"W
		C4_Crenicichla_tapii_thick_lips_Deseado					JF520013.1	JF519879.1	Piálek et al., 2012
		C451_Crenicichla_tapii_smallmouth_Deseado					MW563475	MW554860	Iguazú basin, Arroyo Deseado at Deseado camp, tributary of Rio San Antonio, 25°40'11.67"S, 53°55'59.50"W
		C366_Crenicichla_tapii_Nandu					MW563468	MW554853	Iguazú basin, Rio Iguazú in NP Iguazú, camp at mouth or Arroyo Ñandu, 25°42'11.74"S, 54°25'31.15"W
		C5_Crenicichla_tapii_Deseado					JF520115.1	JF519981.1	Piálek et al., 2012
		C468_Crenicichla_tapii						MW554870	Iguazú basin, Arroyo Deseado at Deseado camp, tributary of Rio San Antonio, 25°40'11.67"S, 53°55'59.50"W
		C6_Crenicichla_tapii_Deseado					JF520116.1	JF519982.1	Piálek et al., 2012
		C371_Crenicichla_tapii_Nandu					KY356712.1	KY356599.1	Piálek et al., 2019a,b
		C394_Crenicichla_tapii_Nandu					KY356716.1	KY356603.1	Piálek et al., 2019a,b
		C401_Crenicichla_tapii_female_Nandu					KY356711.1	KY356598.1	Piálek et al., 2019a,b
		C564_Crenicichla_tapii_Garganta						KY356597.1	Piálek et al., 2019a,b
		C373_Crenicichla_tapii_Nandu					KY356714.1	KY356601.1	Piálek et al., 2019a,b
		C374_Crenicichla_tapii_Nandu					KY356715.1	KY356602.1	Piálek et al., 2019a,b
		C372_Crenicichla_tapii_Nandu					KY356713.1	KY356600.1	Piálek et al., 2019a,b
Crenicichla aff. mandelburgeri	aff. mandelburgeri	C137_Crenicichla_aff_mandelburgeri_Poromoco	1	1	1	1	KY356667.1		Piálek et al., 2019a,b
		C138_Crenicichla_aff_mandelburgeri_Pirayuy					JF520046.1	JF519912.1	Piálek et al., 2012
		C104_Crenicichla_aff_mandelburgeri_Garupa_E1_65					JF520045.1	JF519911.1	Piálek et al., 2012
		C135_Crenicichla_aff_mandelburgeri_Encarnacion					KY356659.1		Piálek et al., 2019a,b
		DNA6_Crenicichla_cf_mandelburgeri					MW563660		Rio Paraná basin, Arroyo Garupa, Balneario Candelaria, S 27 29 10.2, W 55 44 23.1
		C103_Crenicichla_aff_mandelburgeri_Garupa_E1_62					JF520044.1	JF519910.1	Piálek et al., 2012
		C134_Crenicichla_aff_mandelburgeri_Encarnacion					JF520043.1	JF519909.1	Piálek et al., 2012
		C136_Crenicichla_aff_mandelburgeri_Encarnacion					KY356660.1		Piálek et al., 2019a,b
		C149_Crenicichla_aff_mandelburgeri_Tabay_down_E1_58					JF520050.1	JF519916.1	Piálek et al., 2012
		C106_Crenicichla_aff_mandelburgeri_Tabay_down					JF520047.1	JF519913.1	Piálek et al., 2012
		C108_Crenicichla_aff_mandelburgeri_Tabay_up					JF520051.1	JF519917.1	Piálek et al., 2012
		C148_Crenicichla_aff_mandelburgeri_Tabay_down					JF520049.1	JF519915.1	Piálek et al., 2012
		C139_Crenicichla_aff_mandelburgeri_Pirayuy					KY356666.1		Piálek et al., 2019a,b
		C151_Crenicichla_aff_mandelburgeri_Tabay_up					JF520052.1	JF519918.1	Piálek et al., 2012
		C107_Crenicichla_aff_mandelburgeri_Tabay_down					JF520048.1	JF519914.1	Piálek et al., 2012
		C49_Crenicichla_aff_mandelburgeri_Tucangua					JF520054.1	JF519920.1	Piálek et al., 2012
		C205_Crenicichla_cf_mandelburgeri					MW563383	MW554746	Rio Paraná basin, Rio Cuña Pirú, 27°02'18.5" S, 55°02'14.1" W
		C48_Crenicichla_aff_mandelburgeri_Tucangua					JF520053.1	JF519919.1	Piálek et al., 2012
		C44_Crenicichla_aff_mandelburgeri_Cunapiru					JF520041.1	JF519907.1	Piálek et al., 2012
		C91_Crenicichla_aff_mandelburgeri_Tucangua_E1_62					JF520055.1	JF519921.1	Piálek et al., 2012
		C90_Crenicichla_aff_mandelburgeri_Cunapiru					KY356657.1		Piálek et al., 2019a,b
		C45_Crenicichla_aff_mandelburgeri_Cunapiru					JF520042.1	JF519908.1	Piálek et al., 2012
Crenicichla yjhui Piálek, Casciotta, Almirón & Říčan, 2018 (valid)	yjhui (sp. Urugua-í line)	C161_Crenicichla_yjhui	0	0	0	1	KY356709.1		Piálek et al., 2019a,b
		C160_Crenicichla_yjhui					KY356708.1		Piálek et al., 2019a,b
		C159_Crenicichla_yjhui					KY356707.1		Piálek et al., 2019a,b
		C155_Crenicichla_yjhui					JF520109.1	JF519975.1	Piálek et al., 2012
		C157_Crenicichla_yjhui					KY356705.1		Piálek et al., 2019a,b
		C154_Crenicichla_yjhui					KY356703.1		Piálek et al., 2019a,b
		C152_Crenicichla_yjhui					JF520108.1	JF519974.1	Piálek et al., 2012
		C206_Crenicichla_yjhui					JF520110.1	JF519976.1	Piálek et al., 2012
		C10_Crenicichla_yjhui					KY356702.1		Piálek et al., 2019a,b
		C158_Crenicichla_yjhui					KY356706.1		Piálek et al., 2019a,b
		C156_Crenicichla_yjhui					KY356704.1		Piálek et al., 2019a,b
Crenicichla mandelburgeri Kullander, 2009 (valid)	mandelburgeri	C40_Crenicichla_mandelburgeri_Paranay_Guazu	1	1	1	1	JF520035.1	JF519901.1	Piálek et al., 2012
		C524_Crenicichla_mandelburgeri_Paranay_Guazu					KY356673.1		Piálek et al., 2019a,b
		C88_Crenicichla_mandelburgeri_Paranay_Guazu					KY356669.1		Piálek et al., 2019a,b
		C41_Crenicichla_mandelburgeri_Paranay_Guazu					JF520036.1	JF519902.1	Piálek et al., 2012
		C525_Crenicichla_mandelburgeri_Paranay_Guazu					KY356674.1		Piálek et al., 2019a,b
		C95_Crenicichla_mandelburgeri_Paranay_Guazu					KY356672.1		Piálek et al., 2019a,b
		C89_Crenicichla_mandelburgeri_Paranay_Guazu					KY356670.1		Piálek et al., 2019a,b
		C57_Crenicichla_mandelburgeri_Paranay_Guazu					JF520038.1	JF519904.1	Piálek et al., 2012
		C56_Crenicichla_mandelburgeri_Paranay_Guazu					JF520037.1	JF519903.1	Piálek et al., 2012
		C94_Crenicichla_mandelburgeri_Paranay_Guazu					KY356671.1		Piálek et al., 2019a,b
		C445_Crenicichla_mandelburgeri_Piray_Mini_low					KY356676.1	KY356574.1	Piálek et al., 2019a,b
		C441_Crenicichla_mandelburgeri_Piray_Mini_low					KY356675.1	KY356573.1	Piálek et al., 2019a,b
		C446_Crenicichla_mandelburgeri_Piray_Mini_low					KY356677.1	KY356575.1	Piálek et al., 2019a,b
		C379_Crenicichla_mandelburgeri_Macuco					KY356664.1	KY356570.1	Piálek et al., 2019a,b
		C114_Crenicichla_mandelburgeri_Elena					KY356658.1		Piálek et al., 2019a,b
		C392_Crenicichla_mandelburgeri_band_Macuco					KY356661.1	KY356567.1	Piálek et al., 2019a,b
		C375_Crenicichla_mandelburgeri_Macuco					KY356662.1	KY356568.1	Piálek et al., 2019a,b
		C105_Crenicichla_mandelburgeri_Nacanguazu					KY356668.1	KY356572.1	Piálek et al., 2019a,b
		C378_Crenicichla_mandelburgeri_Macuco					KY356663.1	KY356569.1	Piálek et al., 2019a,b
		C113_Crenicichla_mandelburgeri_Elena_E1_63					JF520032.1	JF519898.1	Piálek et al., 2012
		C140_Crenicichla_mandelburgeri_Tembey					JF520030.1	JF519896.1	Piálek et al., 2012
		C51_Crenicichla_mandelburgeri_Guaruhape_E1_57					JF520033.1	JF519899.1	Piálek et al., 2012
		C52_Crenicichla_mandelburgeri_Guaruhape					JF520034.1	JF519900.1	Piálek et al., 2012
		C141_Crenicichla_mandelburgeri_Tembey					JF520031.1	JF519897.1	Piálek et al., 2012
		C393_Crenicichla_mandelburgeri_Macuco_big					KY356665.1	KY356571.1	Piálek et al., 2019a,b
		C109_Crenicichla_mandelburgeri_Tabay_up					JF520039.1	JF519905.1	Piálek et al., 2012
		C150_Crenicichla_mandelburgeri_Tabay_up					JF520040.1	JF519906.1	Piálek et al., 2012
Crenicichla sp. aff. iguassuensis	sp. aff. iguassuensis	K5_Crenicichla_cf_iguassuensis_Kullander_GQ199954	1	1	1	1		GQ199954.1	Kullander et al. 2010. Phylogenetic relationships of species of Crenicichla (Teleostei: Cichlidae) from southern South America based on the mitochondrial cytochrome b gene. J. Zoolog. Syst. Evol. Res. 48 (3), 248-258 (2010)
Crenicichla iguassuensis Haseman, 1911 (valid)	iguassuensis	C172_Crenicichla_iguassuensis_biglips_Deseado	1	1	2	2	JF520106.1	JF519972.1	Piálek et al., 2012
		C168_Crenicichla_iguassuensis_small_mouth_Deseado					JF520107.1	JF519973.1	Piálek et al., 2012
		C2_Crenicichla_iguassuensis_Deseado					JF520100.1	JF519966.1	Piálek et al., 2012
		C452_Crenicichla_iguassuensis_Deseado					MW563476	MW554861	Iguazú basin, Arroyo Deseado at Deseado camp, tributary of Rio San Antonio, 25°40'11.67"S, 53°55'59.50"W
		C460_Crenicichla_cf_iguassuensis						MW554867	Iguazú basin, Arroyo Deseado at Deseado camp, tributary of Rio San Antonio, 25°40'11.67"S, 53°55'59.50"W
		C461_Crenicichla_cf_iguassuensis						MW554868	Iguazú basin, Arroyo Deseado at Deseado camp, tributary of Rio San Antonio, 25°40'11.67"S, 53°55'59.50"W
		C454_Crenicichla_iguassuensis_Deseado					MW563478	MW554863	Iguazú basin, Arroyo Deseado at Deseado camp, tributary of Rio San Antonio, 25°40'11.67"S, 53°55'59.50"W
		C1_Crenicichla_iguassuensis_Deseado					JF520099.1	JF519965.1	Piálek et al., 2012
		C463_Crenicichla_cf_iguassuensis						MW554869	Iguazú basin, Arroyo Deseado at Deseado camp, tributary of Rio San Antonio, 25°40'11.67"S, 53°55'59.50"W
		C450_Crenicichla_iguassuensis_Deseado					MW563474	MW554859	Iguazú basin, Arroyo Deseado at Deseado camp, tributary of Rio San Antonio, 25°40'11.67"S, 53°55'59.50"W
		C456_Crenicichla_iguassuensis_Deseado					KY356642.1	KY356550.1	Piálek et al., 2019a,b
		C457_Crenicichla_iguassuensis_Deseado						KY356551.1	Piálek et al., 2019a,b
		C462_Crenicichla_iguassuensis						KY356548.1	Piálek et al., 2019a,b
		C449_Crenicichla_iguassuensis_Deseado					KY356641.1	KY356549.1	Piálek et al., 2019a,b
		C398_Crenicichla_iguassuensis_Nandu					KY356648.1	KY356557.1	Piálek et al., 2019a,b
		C406_Crenicichla_iguassuensis_Nandu					KY356649.1	KY356558.1	Piálek et al., 2019a,b
		C170_Crenicichla_iguassuensis_Iguazu					JF520104.1	JF519970.1	Piálek et al., 2012
		C171_Crenicichla_iguassuensis_Iguazu					JF520105.1	JF519971.1	Piálek et al., 2012
		C380_Crenicichla_iguassuensis_cf_mandelburgeri_Macuco					KY356646.1	KY356555.1	Piálek et al., 2019a,b
		C166_Crenicichla_iguassuensis_Deseado					JF520103.1	JF519969.1	Piálek et al., 2012
		C12_Crenicichla_iguassuensis_affluent_Iguazu					JF520102.1	JF519968.1	Piálek et al., 2012
		C11_Crenicichla_iguassuensis_affluent_Iguazu					JF520101.1	JF519967.1	Piálek et al., 2012
		C415_Crenicichla_iguassuensis_San_Antonio					KY356653.1	KY356562.1	Piálek et al., 2019a,b
		C413_Crenicichla_iguassuensis_San_Antonio					KY356652.1	KY356561.1	Piálek et al., 2019a,b
		C410_Crenicichla_iguassuensis_San_Antonio					KY356651.1	KY356560.1	Piálek et al., 2019a,b
		C397_Crenicichla_iguassuensis_Nandu					KY356647.1	KY356556.1	Piálek et al., 2019a,b
		C407_Crenicichla_iguassuensis_Nandu					KY356650.1	KY356559.1	Piálek et al., 2019a,b
		C399_Crenicichla_iguassuensis_giant_Nandu					KY356644.1	KY356553.1	Piálek et al., 2019a,b
		C385_Crenicichla_iguassuensis_Yacui					KY356656.1	KY356565.1	Piálek et al., 2019a,b
		C383_Crenicichla_iguassuensis_Yacui					KY356655.1	KY356564.1	Piálek et al., 2019a,b
		C388_Crenicichla_iguassuensis_Garganta					KY356643.1	KY356552.1	Piálek et al., 2019a,b
		C376_Crenicichla_iguassuensis_cf_mandelburgeri_Macuco					KY356645.1	KY356554.1	Piálek et al., 2019a,b
		C382_Crenicichla_iguassuensis_Yacui					KY356654.1	KY356563.1	Piálek et al., 2019a,b
Crenicichla tuca Piálek et al., 2015 (valid)	tuca	C363_Crenicichla_tuca_Nandu	1	1	1	1	KY356739.1	KY356627.1	Piálek et al., 2019a,b
		C365_Crenicichla_tuca_Nandu					KY356741.1	KY356629.1	Piálek et al., 2019a,b
		C169_Crenicichla_tuca_Iguazu					JF520015.1	JF519881.1	Piálek et al., 2012
		C364_Crenicichla_tuca_Nandu					KY356740.1	KY356628.1	Piálek et al., 2019a,b
		C390_Crenicichla_tuca_juv_Garganta					KY356738.1	KY356626.1	Piálek et al., 2019a,b
		C164_Crenicichla_tuca_Deseado					JF520014.1	JF519880.1	Piálek et al., 2012
Crenicichla mandelburgeri Kullander, 2009 (valid)	mandelburgeri	C58_Crenicichla_sp_Chapa	0	0	0	0	JF519995.1	JF519861.1	Piálek et al., 2012
		C59_Crenicichla_sp_Chapa						KY356566.1	Piálek et al., 2019a,b
		C198_Crenicichla_cf_mandelburgeri					MW563379		Rio Paraná basin, Rio Paraná at Eldorado
Crenicichla taikyra Casciotta et al., 2013 (valid)	taikyra	C144_Crenicichla_taikyra_Parana	0	0	0	0	KY356710.1		Piálek et al., 2019a,b
		C143_Crenicichla_taikyra_Parana					JF520079.1	JF519945.1	Piálek et al., 2012
		C142_Crenicichla_taikyra_Parana					JF520078.1	JF519944.1	Piálek et al., 2012
Crenicichla sp. Piray Guazu line	sp. Piray Guazu line	C211_Crenicichla_sp_Piray_Guazu_line	0	0	0	0	JF520087.1	JF519953.1	Piálek et al., 2012
		C212_Crenicichla_sp_Piray_Guazu_line					JF520088.1	JF519954.1	Piálek et al., 2013
		C16_Crenicichla_sp_Piray_Guazu_line					JF520084.1	JF519950.1	Piálek et al., 2014
		C18_Crenicichla_sp_Piray_Guazu_line					JF520085.1	JF519951.1	Piálek et al., 2015
		C186_Crenicichla_sp_Piray_Guazu_line_cf_madelburgeri					MW563369		Rio Paraná basin, lower Piray-Guazú at camp, 26°29'1.66"S, 54°35'11.98"W
		C432_Crenicichla_sp_Piray_Guazu_line_cf_mandelburgeri_low					KY356695.1	KY356590.1	Piálek et al., 2019a,b
		C438_Crenicichla_sp_Piray_Guazu_line_cf_mandelburgeri_low					KY356700.1	KY356595.1	Piálek et al., 2019a,b
		C430_Crenicichla_sp_Piray_Guazu_line_cf_mandelburgeri_low					KY356693.1	KY356585.1	Piálek et al., 2019a,b
		C431_Crenicichla_sp_Piray_Guazu_line_cf_mandelburgeri_low					KY356694.1	KY356589.1	Piálek et al., 2019a,b
		C82_Crenicichla_sp_Piray_Guazu_line					KY356690.1		Piálek et al., 2019a,b
		C437_Crenicichla_sp_Piray_Guazu_line_low					KY356701.1	KY356596.1	Piálek et al., 2019a,b
		C420_Crenicichla_sp_Piray_Guazu_line_cf					KY356688.1	KY356586.1	Piálek et al., 2019a,b
		C436_Crenicichla_sp_Piray_Guazu_line_cf_mandelburgeri_low					KY356699.1	KY356594.1	Piálek et al., 2019a,b
		C429_Crenicichla_sp_Piray_Guazu_line_cf_mandelburgeri_low					KY356692.1	KY356588.1	Piálek et al., 2019a,b
		C681_Crenicichla_sp_Piray_Guazu_line					KY356691.1		Piálek et al., 2019a,b
		C213_Crenicichla_sp_Piray_Guazu_line					JF520089.1	JF519955.1	Piálek et al., 2012
		C433_Crenicichla_sp_Piray_Guazu_line_cf_mandelburgeri_low					KY356696.1	KY356591.1	Piálek et al., 2019a,b
		DNA5_Crenicichla_sp_Piray_Guazu_line_cf_mandelburgeri					MW563659		Rio Paraná basin, lower Piray-Guazú at camp, 26°29'1.66"S, 54°35'11.98"W
		C435_Crenicichla_sp_Piray_Guazu_line_cf_mandelburgeri_low					KY356698.1	KY356593.1	Piálek et al., 2019a,b
		C210_Crenicichla_sp_Piray_Guazu_line					JF520086.1	JF519952.1	Piálek et al., 2012
		C434_Crenicichla_sp_Piray_Guazu_line_cf_mandelburgeri_low					KY356697.1	KY356592.1	Piálek et al., 2019a,b
		C426_Crenicichla_sp_Piray_Guazu_line_male					KY356689.1	KY356587.1	Piálek et al., 2019a,b
Crenicichla tesay Casciotta & Almirón, 2009 (valid)	tesay	C408_Crenicichla_tesay_Nandu	1	1	1	1	KY356733.1	KY356621.1	Piálek et al., 2019a,b
		C405_Crenicichla_tesay_Nandu					KY356732.1	KY356620.1	Piálek et al., 2019a,b
		C367_Crenicichla_tesay_Nandu					KY356724.1	KY356613.1	Piálek et al., 2019a,b
		C391_Crenicichla_tesay_Garganta					KY356718.1	KY356609.1	Piálek et al., 2019a,b
		C464_Crenicichla_cf_tesay						KY356605.1	Piálek et al., 2019a,b
		C466_Crenicichla_cf_tesay						KY356607.1	Piálek et al., 2019a,b
		C395_Crenicichla_tesay_juv_Nandu					KY356722.1	KY356611.1	Piálek et al., 2019a,b
		C377_Crenicichla_tesay_cf_taikyra_Macuco					KY356723.1	KY356612.1	Piálek et al., 2019a,b
		C400_Crenicichla_tesay_cf_new_Nandu					MW563469	MW554854	Iguazú basin, Rio Iguazú in NP Iguazú, camp at mouth or Arroyo Ñandu, 25°42'11.74"S, 54°25'31.15"W
		C369_Crenicichla_tesay_Nandu					KY356726.1		Piálek et al., 2019a,b
		C404_Crenicichla_tesay_Nandu					KY356731.1	KY356619.1	Piálek et al., 2019a,b
		C467_Crenicichla_cf_tesay						KY356608.1	Piálek et al., 2019a,b
		C402_Crenicichla_tesay_Nandu					KY356729.1	KY356617.1	Piálek et al., 2019a,b
		C381_Crenicichla_tesay_Yacui					KY356735.1	KY356623.1	Piálek et al., 2019a,b
		C649_Crenicichla_cf_tesay					KY356721.1		Piálek et al., 2019a,b
		C387_Crenicichla_tesay_redfin_Nandu					KY356734.1	KY356622.1	Piálek et al., 2019a,b
		C368_Crenicichla_tesay_Nandu					KY356725.1	KY356614.1	Piálek et al., 2019a,b
		C370_Crenicichla_tesay_Nandu					KY356727.1	KY356615.1	Piálek et al., 2019a,b
		C396_Crenicichla_tesay_Nandu					KY356728.1	KY356616.1	Piálek et al., 2019a,b
		C389_Crenicichla_tesay_Garganta					KY356719.1	KY356610.1	Piálek et al., 2019a,b
		C403_Crenicichla_tesay_Nandu					KY356730.1	KY356618.1	Piálek et al., 2019a,b
		C384_Crenicichla_tesay_Yacui					KY356736.1	KY356624.1	Piálek et al., 2019a,b
		C178_Crenicichla_cf_tesay					KY356720.1	KY356604.1	Piálek et al., 2019a,b
		C526_Crenicichla_tesay_headspots_Deseado					MW563522		Iguazú basin, Arroyo Deseado at Deseado camp, tributary of Rio San Antonio, 25°40'11.67"S, 53°55'59.50"W
		C165_Crenicichla_tesay_Deseado					JF520117.1	JF519983.1	Piálek et al., 2012
		C167_Crenicichla_tesay_Deseado					JF520118.1	JF519984.1	Piálek et al., 2012
		C528_Crenicichla_tesay_shorthead_Deseado					KY356717.1		Piálek et al., 2019a,b
		C386_Crenicichla_tesay_Yacui					KY356737.1	KY356625.1	Piálek et al., 2019a,b
		C414_Crenicichla_tesay_biglips_San_Antonio					MW563473	MW554858	Iguazú basin, Rio San Antonio, 25°59'0.54"S, 53°49'9.56"W
		C465_Crenicichla_cf_tesay						KY356606.1	Piálek et al., 2019a,b
		C658_Crenicichla_cf_tesay_sp_Big_Lip					MW563634		Iguazú basin, Arroyo Deseado at Deseado camp, tributary of Rio San Antonio, 25°40'11.67"S, 53°55'59.50"W
		C527_Crenicichla_tesay_thicklips_Deseado					MW563523		Iguazú basin, Arroyo Deseado at Deseado camp, tributary of Rio San Antonio, 25°40'11.67"S, 53°55'59.50"W
				numbers are clusters per species per method
